# Supplementary material
Source: PubMed Central journal article supplement (PMC6817540)
Supplement: mmc1.pdf [file mmc1.pdf]

**The American Journal of Human Genetics, Volume 105**

**Supplemental Data**

**A Rare Variant Nonparametric Linkage Method for  
Nuclear and Extended Pedigrees with Application  
to Late-Onset Alzheimer Disease via WGS Data**

**Linhai Zhao, Zongxiao He, Di Zhang, Gao T. Wang, Alan E. Renton, Badri N. Vardarajan, Michael Nothnagel, Alison M. Goate, Richard Mayeux, and Suzanne M. Leal**

## Supplemental Material

### Supplemental Figures and Tables

Figure S1. Pedigree structures used for evaluation of intra-familial locus heterogeneity

Pedigrees with intra-familial locus heterogeneity were simulated by generating genotypes on extended families with two branches with three of the four children in the last generation being affected (panel A) and analyzing pedigrees with all children affected (panel B), to mimic intra intra-familial locus heterogeneity

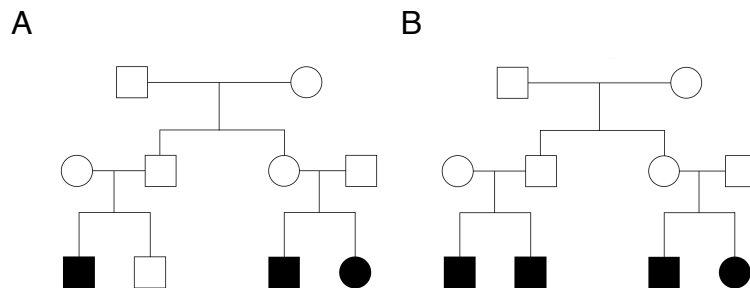

Figure S2. Pedigrees included in the analysis from the Alzheimer's Disease Sequencing Project

The 107 pedigrees (42 European pedigrees and 65 Hispanic pedigrees) which were analyzed. Squares represent males and circles females. Filled symbols are individuals affected Alzheimer's disease and open symbols represent unaffected family members. Those individuals shown in red have whole genome sequence data available, while those in black do not have available genotype data.

### 1. European pedigrees

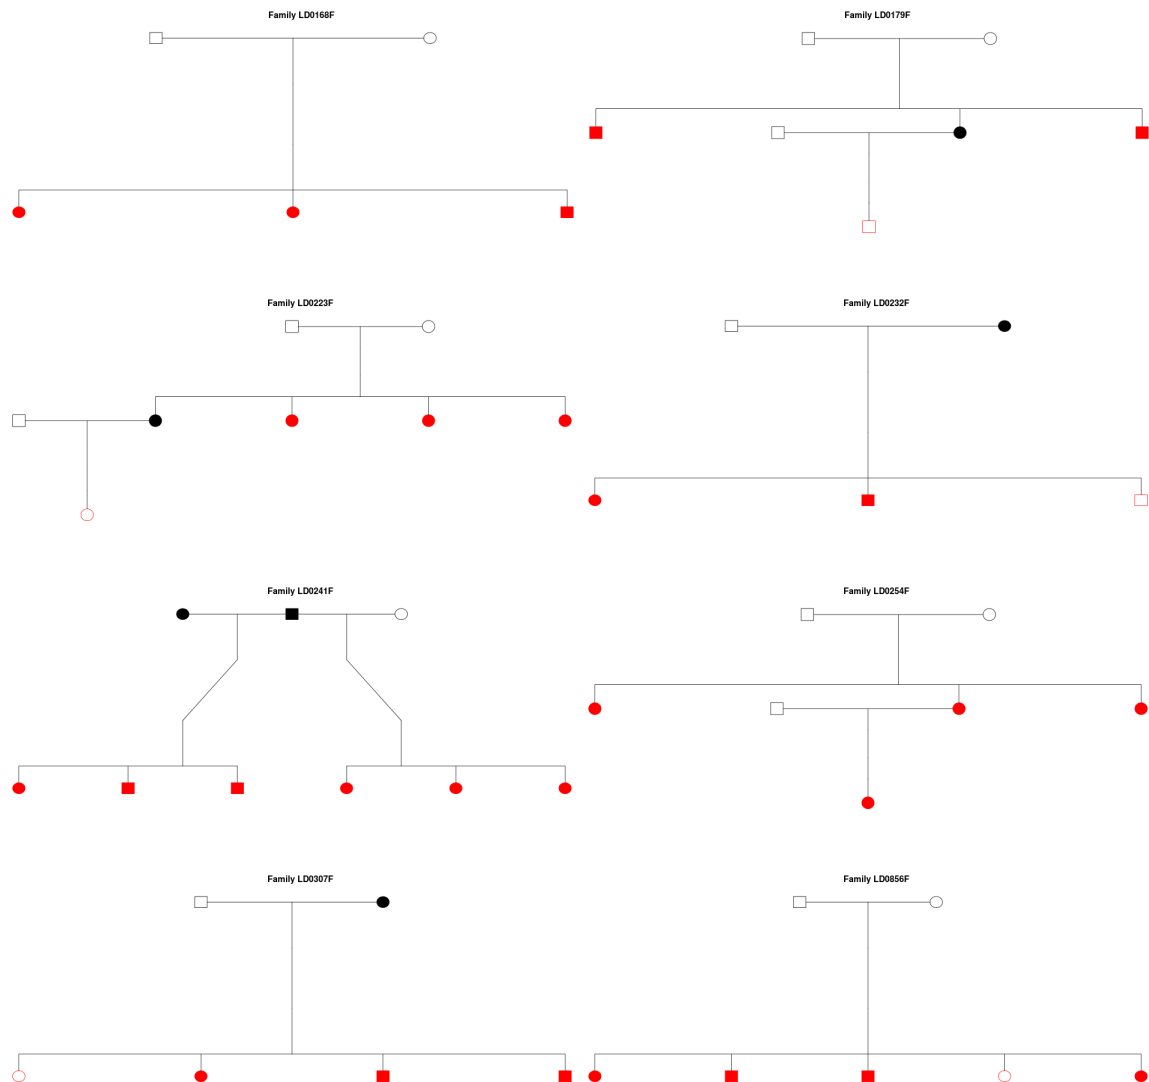

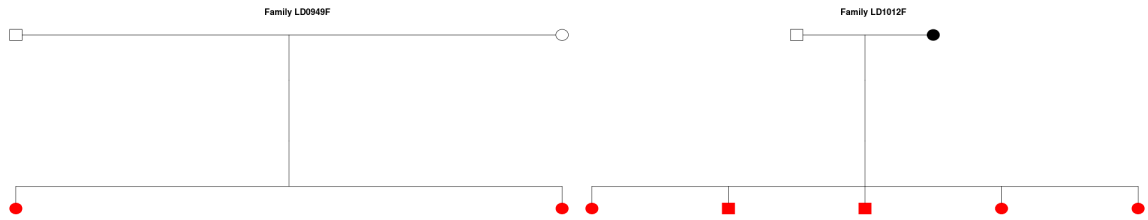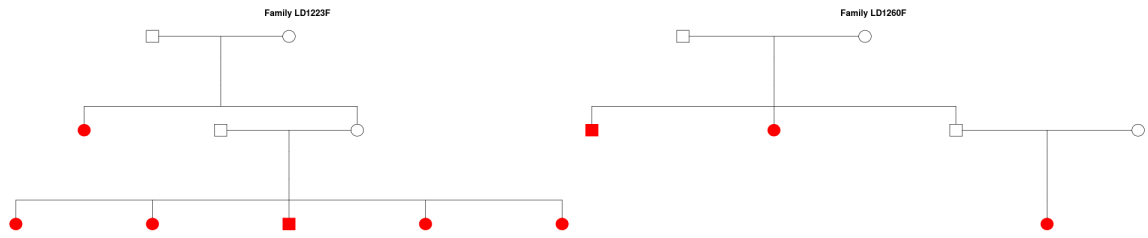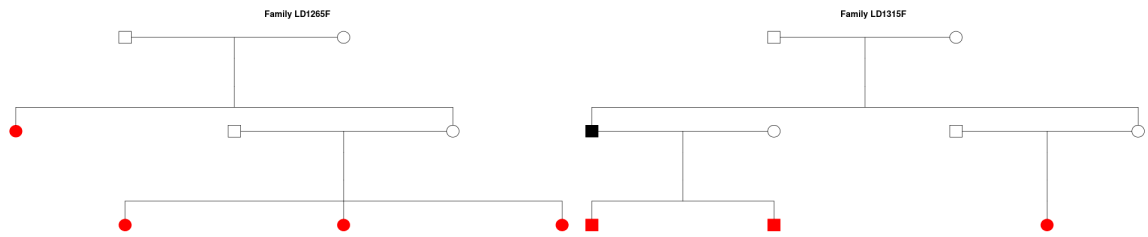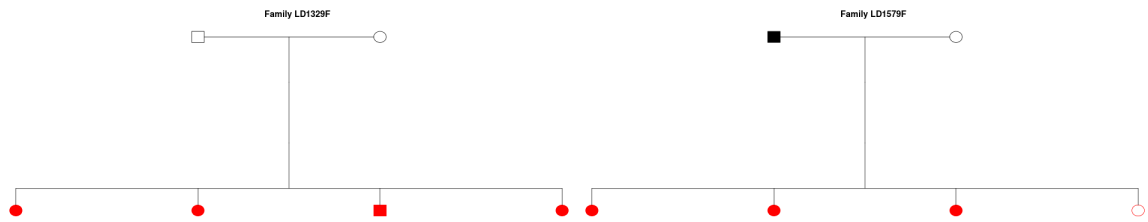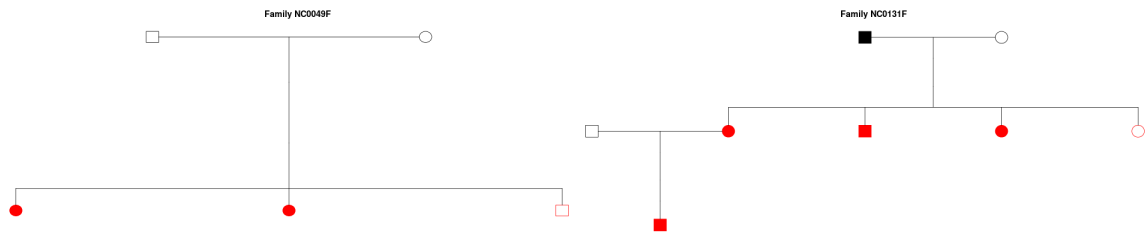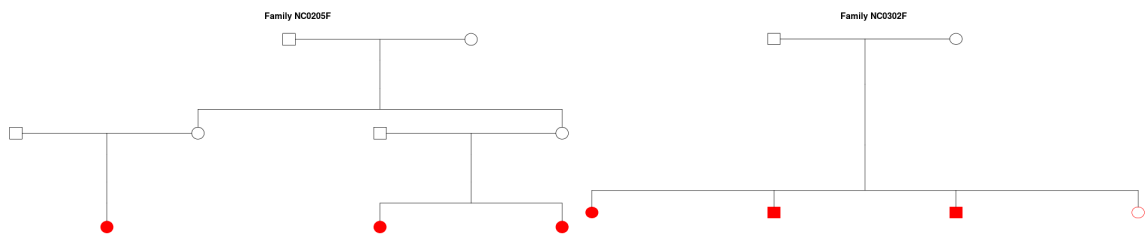

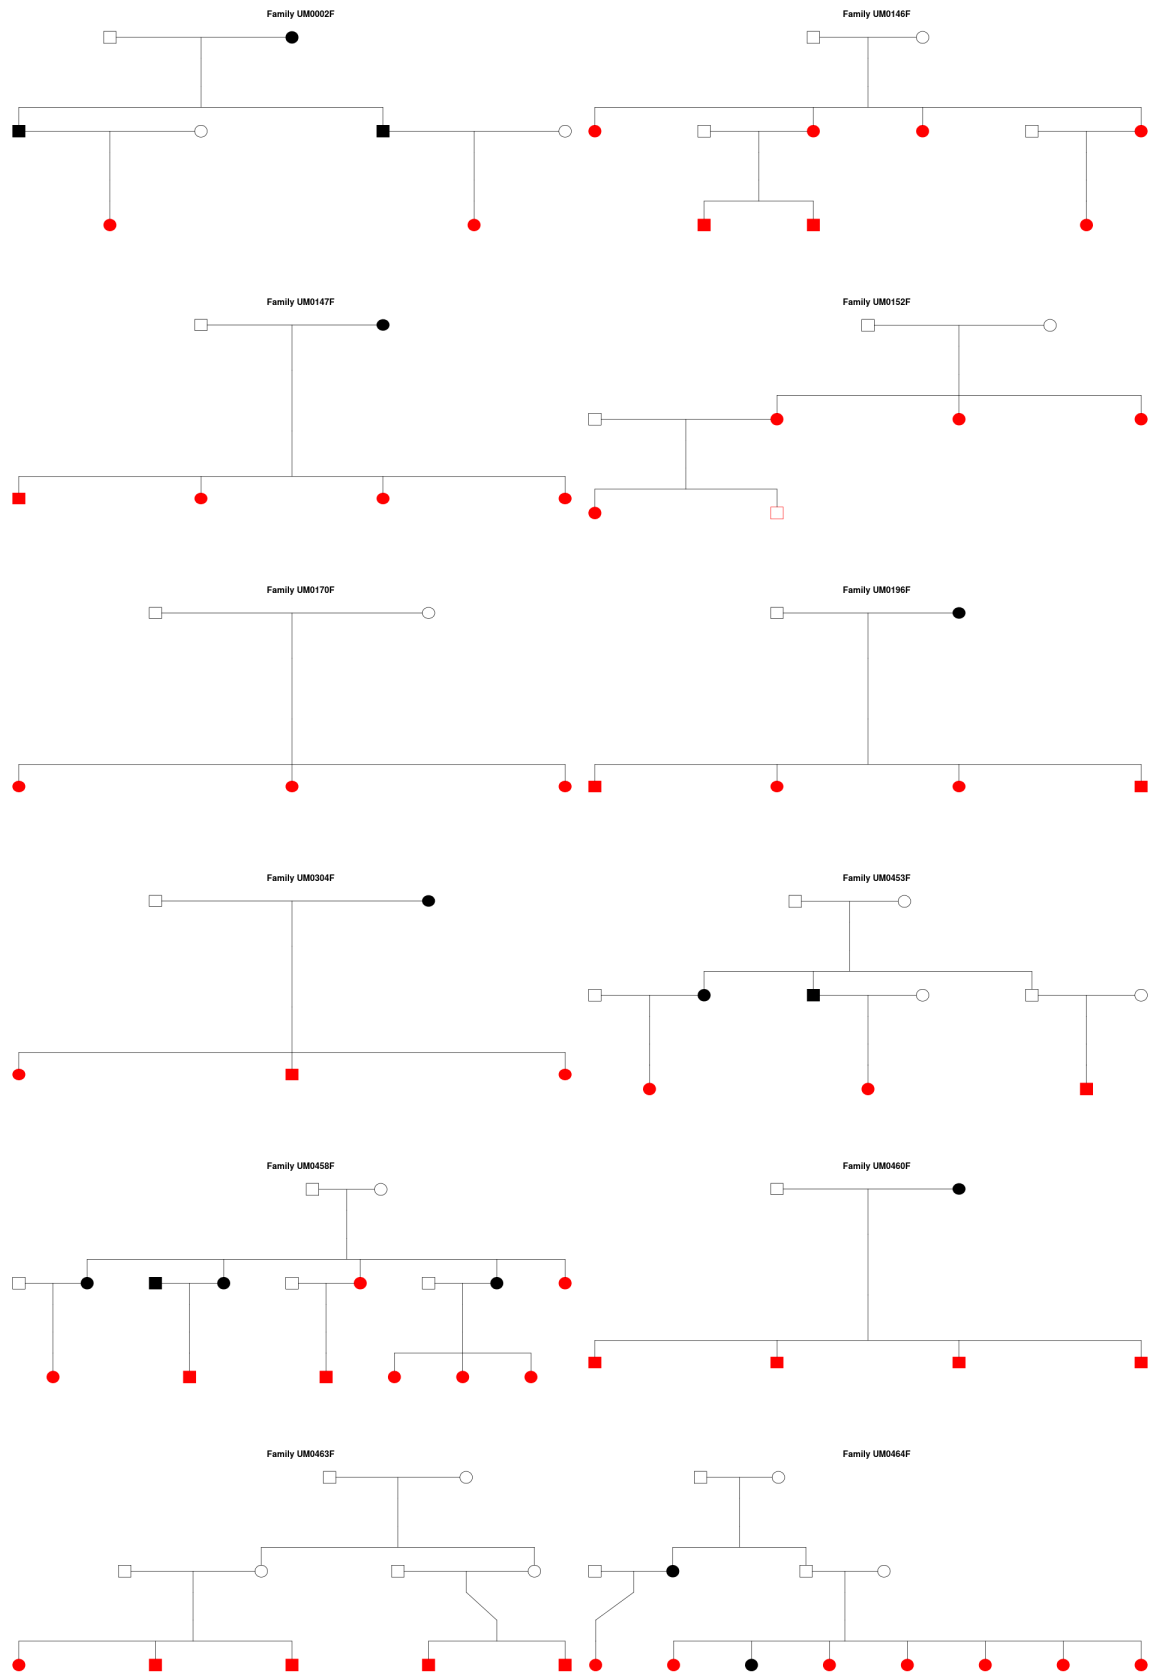

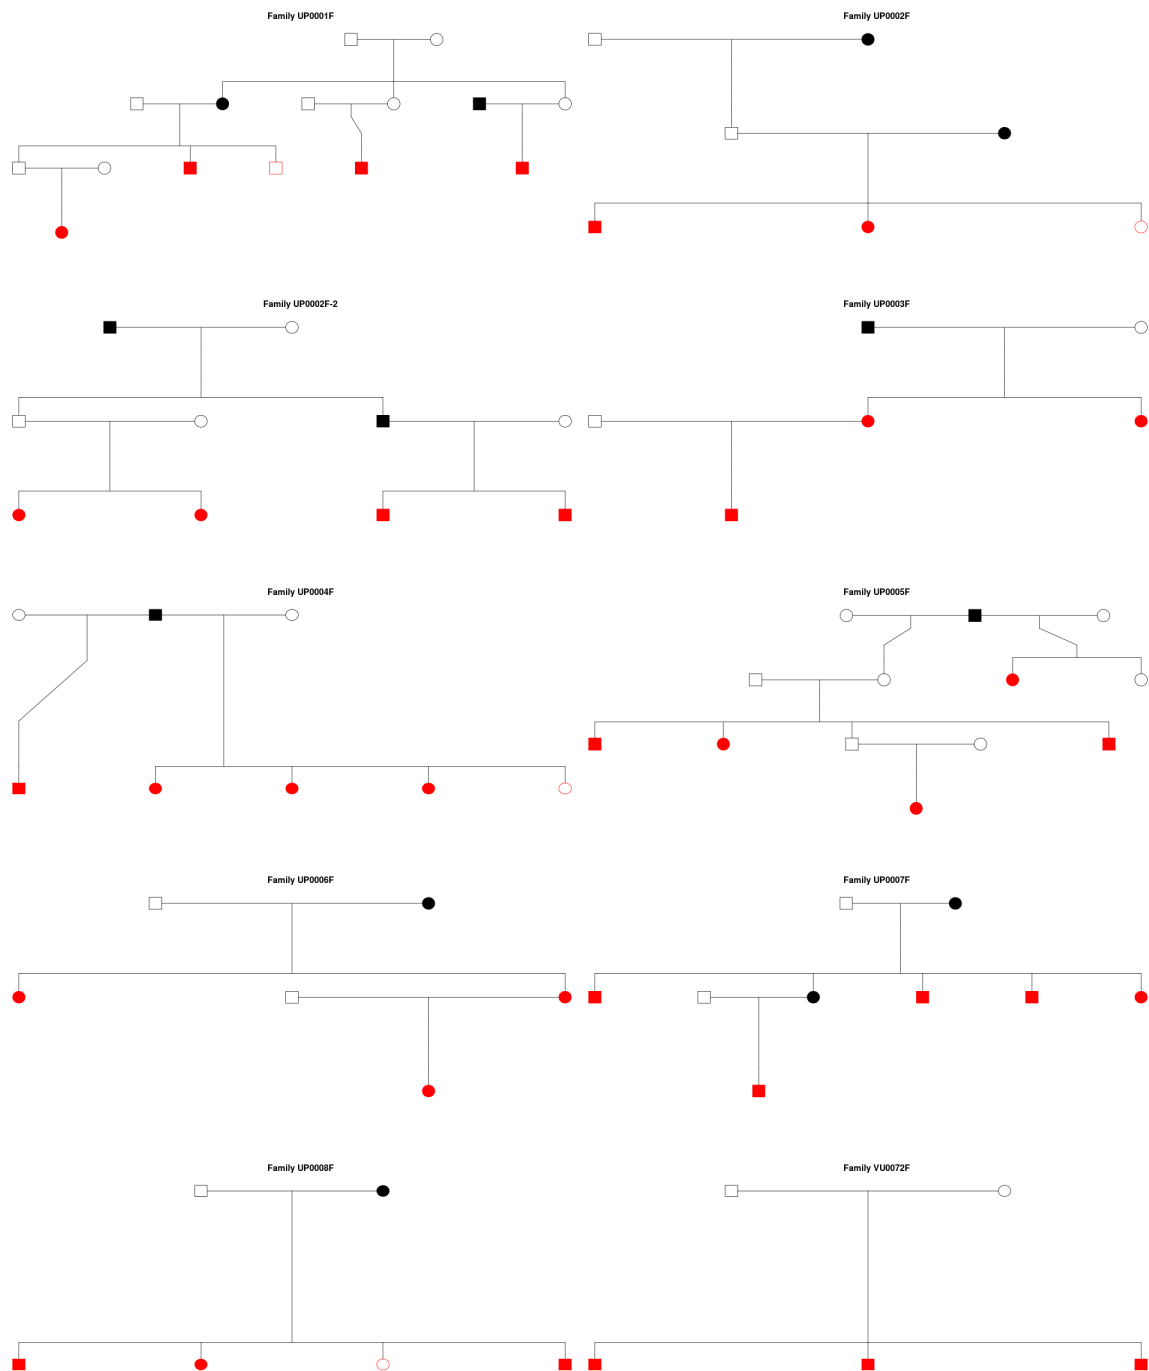



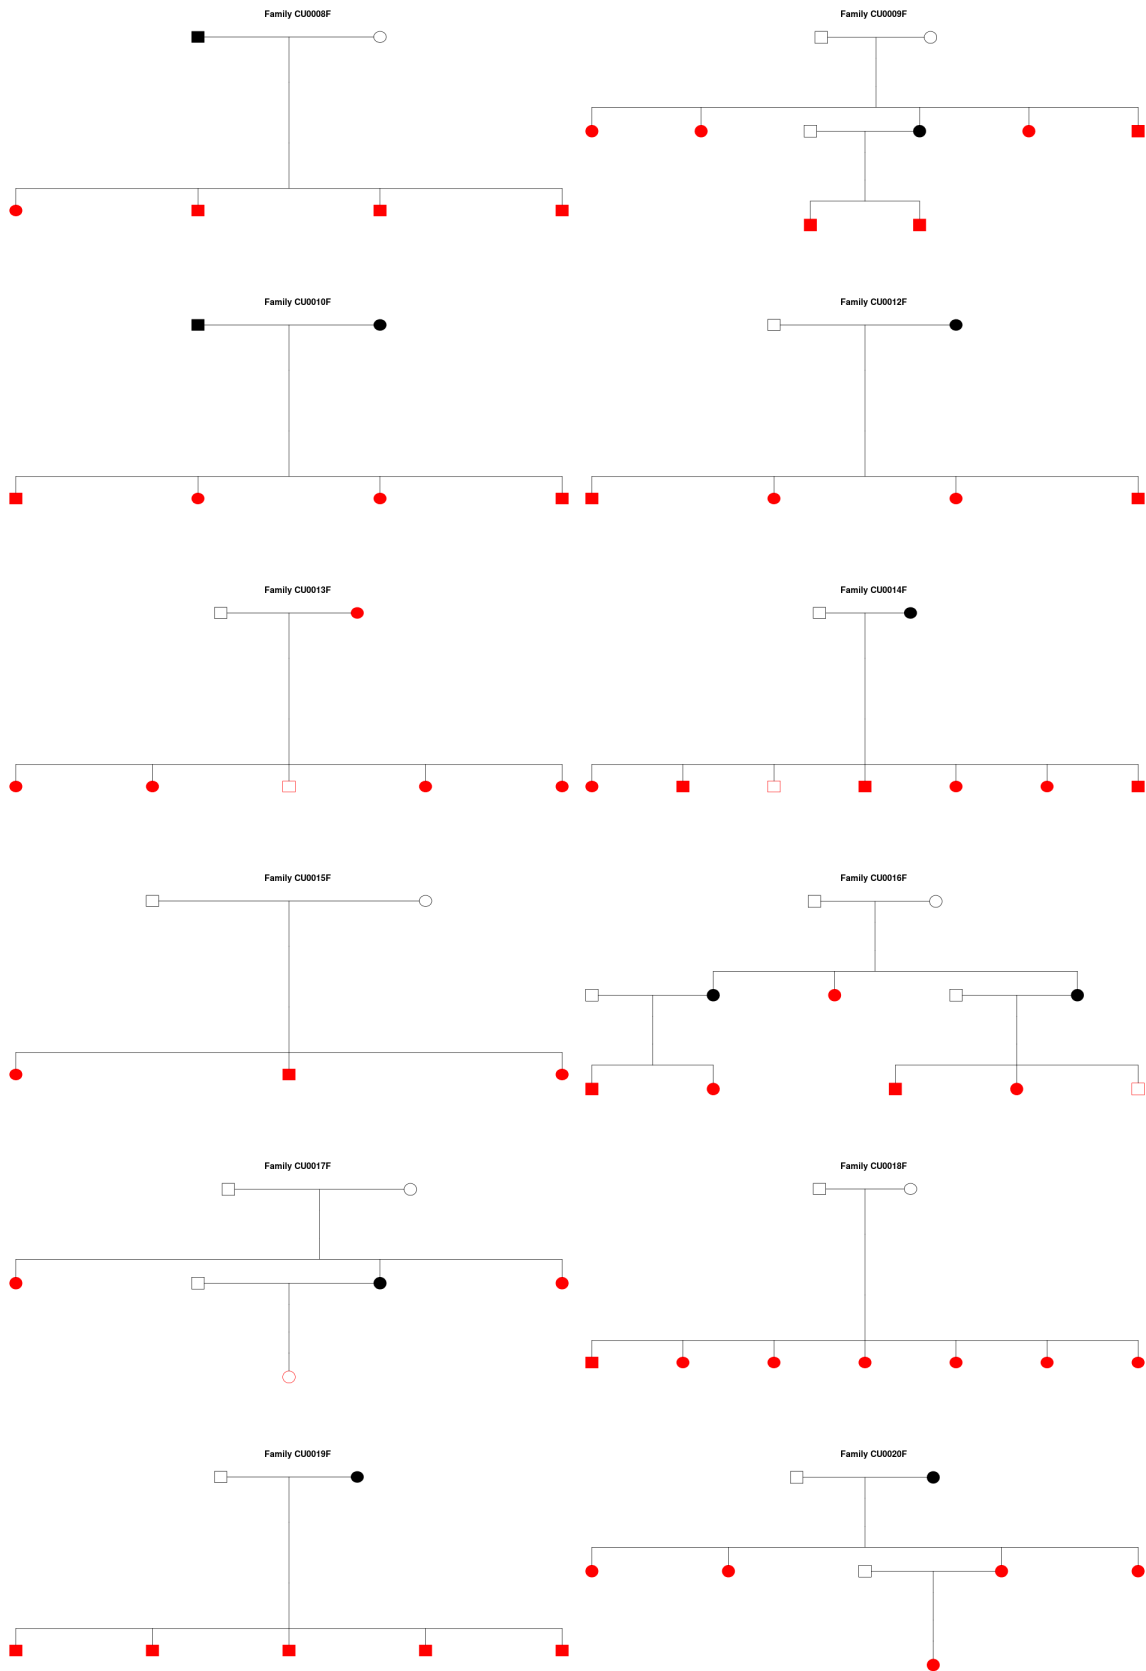

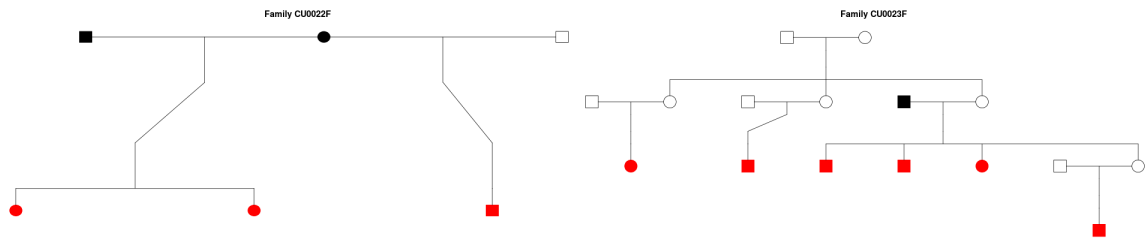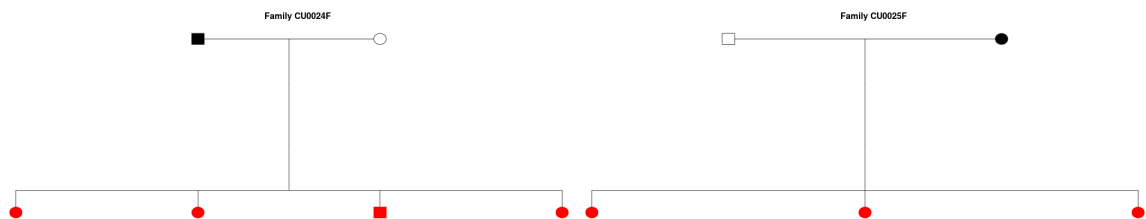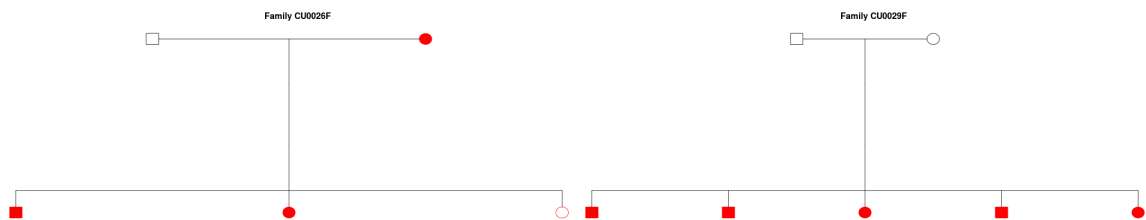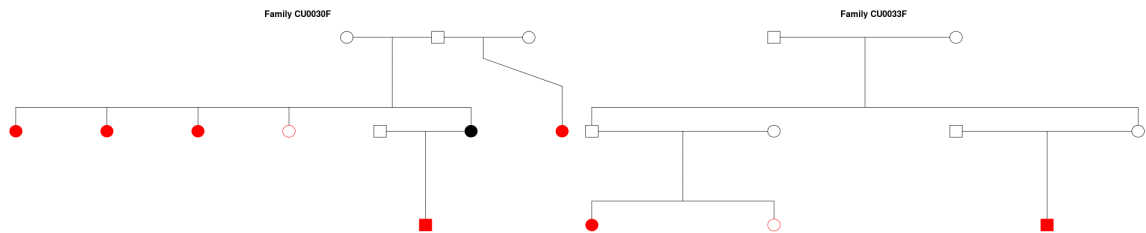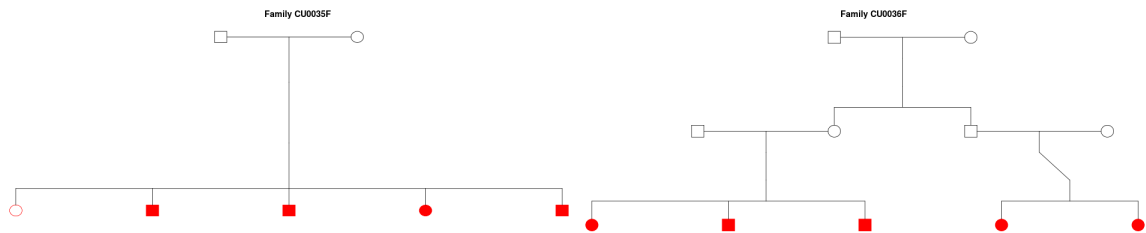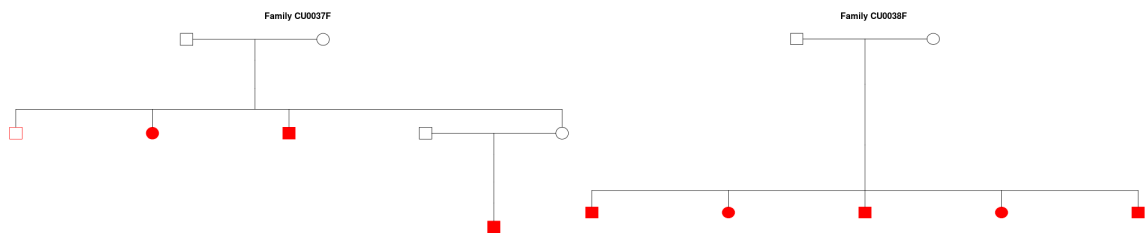

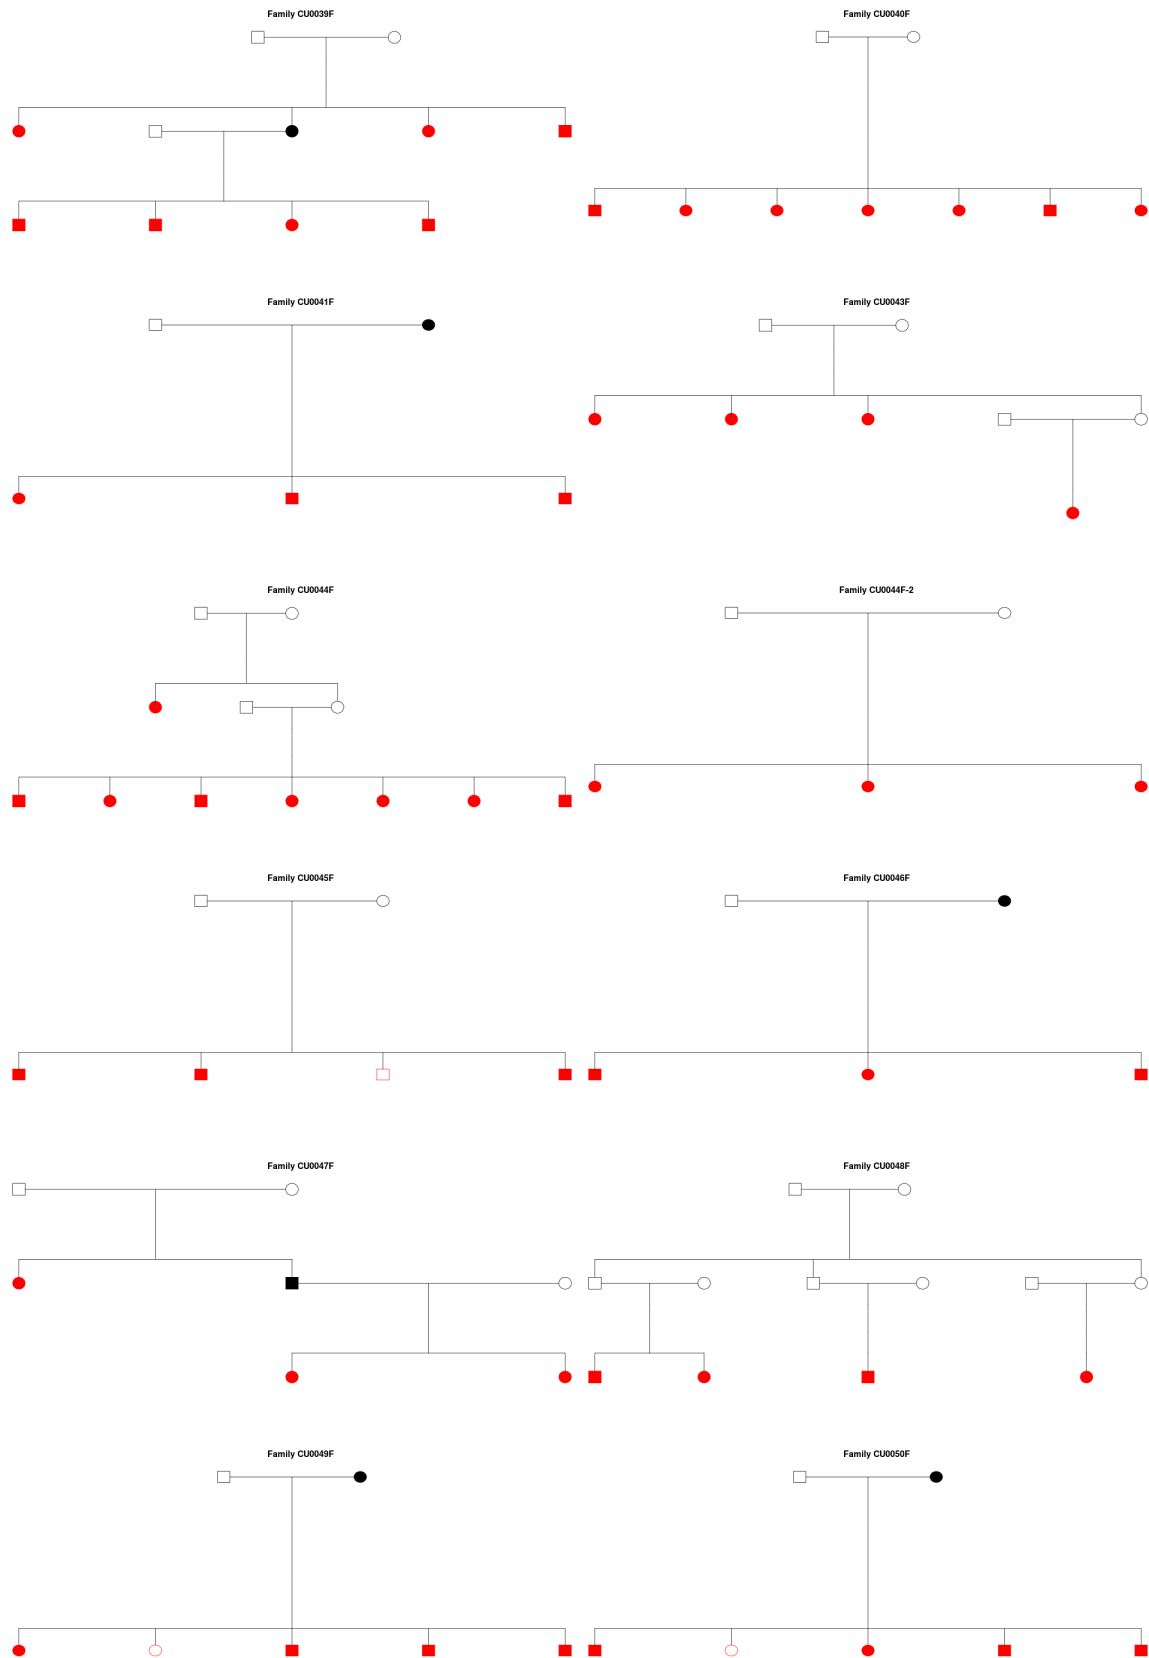

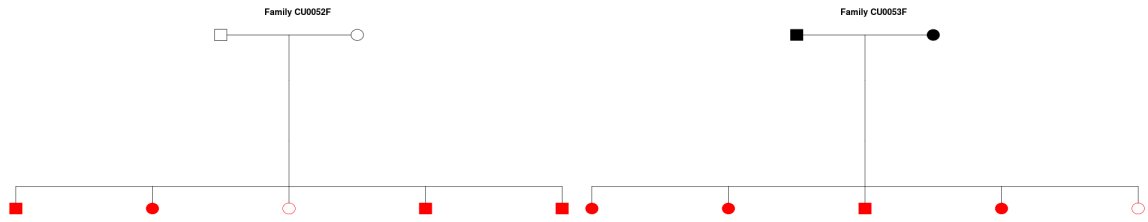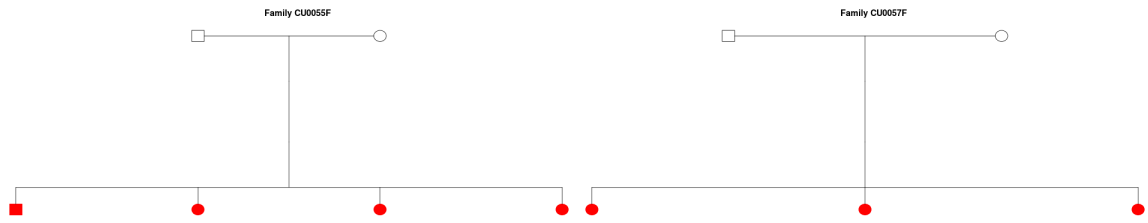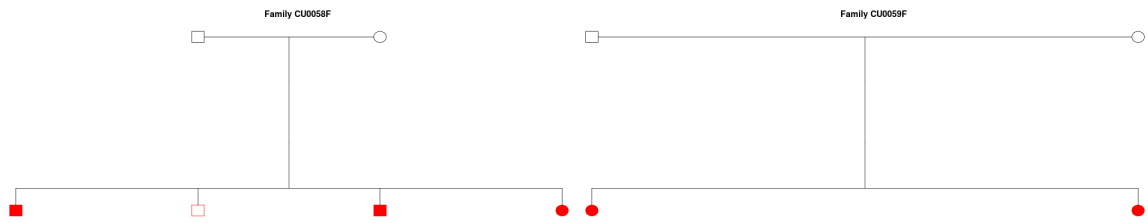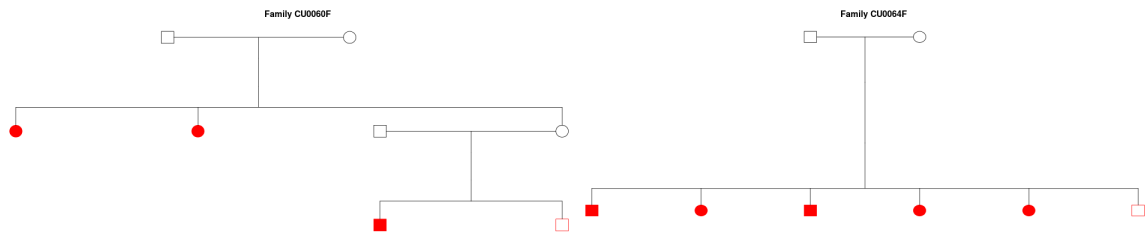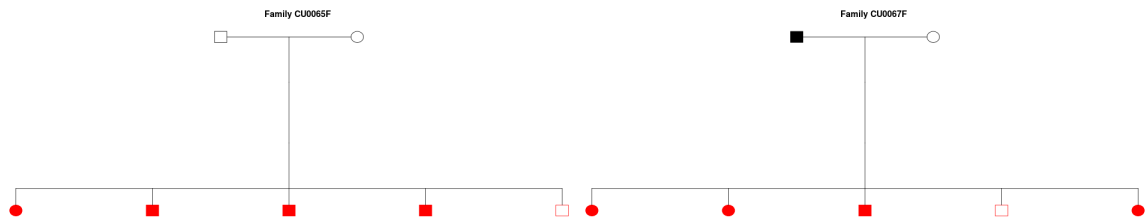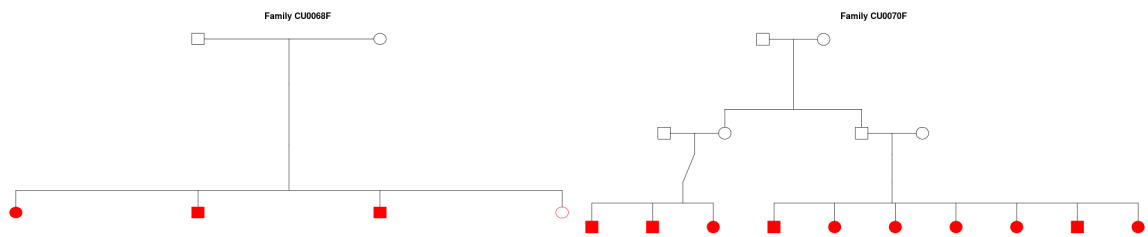

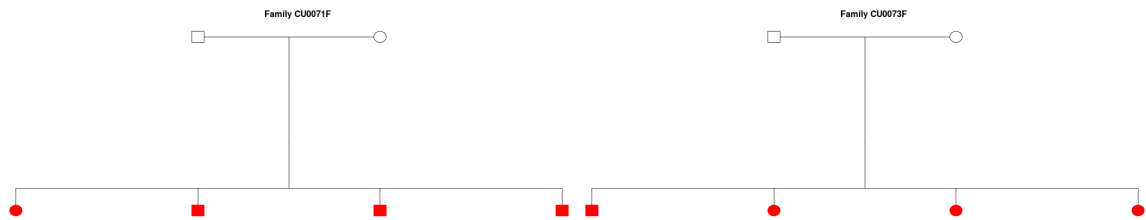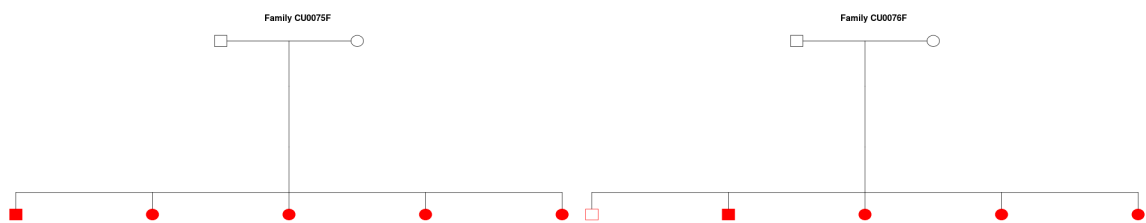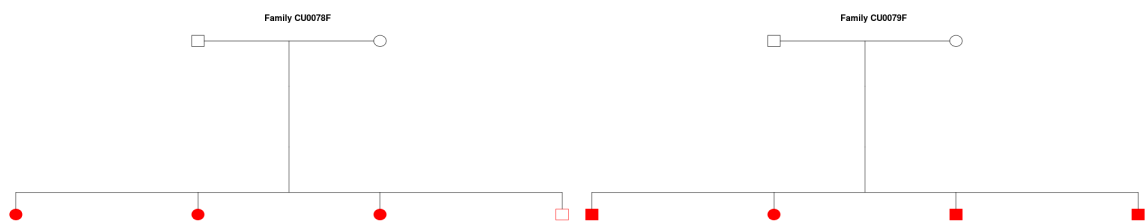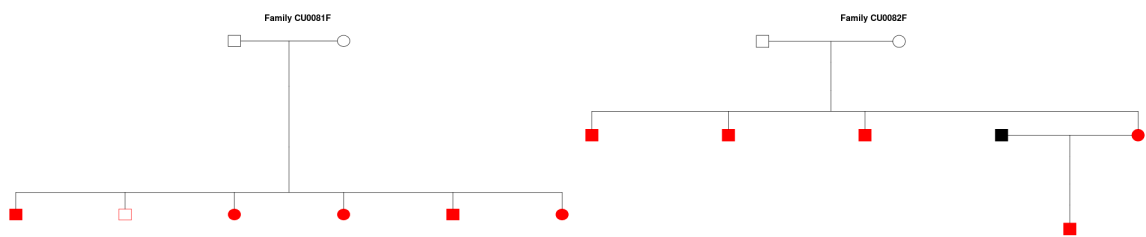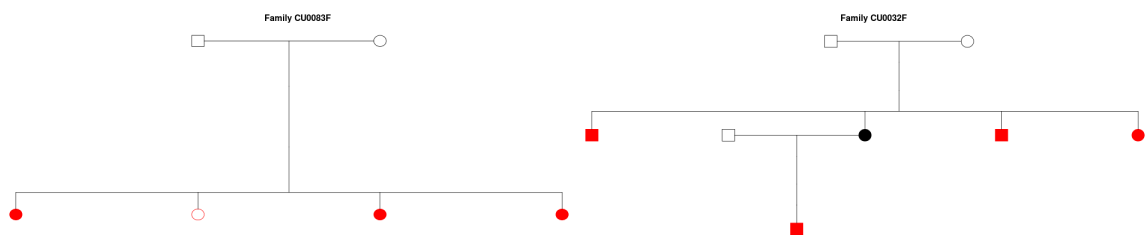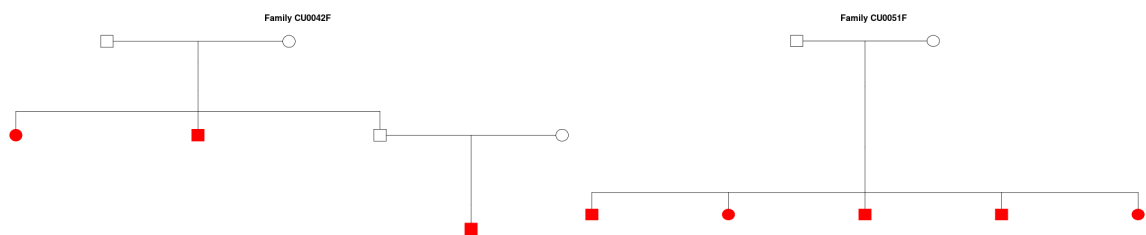

Figure S3. QQ plots for CHP-NPL<sub>Pairs</sub> under the null hypothesis of no linkage

One-thousand replicates of exomes were generated under the null hypothesis of no linkage for 2,000 affected sib-pairs without missing genotype data (panel A); 2,000 affected sib-pairs with founders missing all exome data (panel B); 300 nuclear families with three affected siblings without missing genotype data (panel C); 300 nuclear families with three affected siblings with founders missing all exome data (panel D); 100 extended families without missing genotype data (panel E); and 100 extended families with founders missing all exome data (panel F); and analyzed using CHP-NPL<sub>Pairs</sub> obtaining analytical p-values.

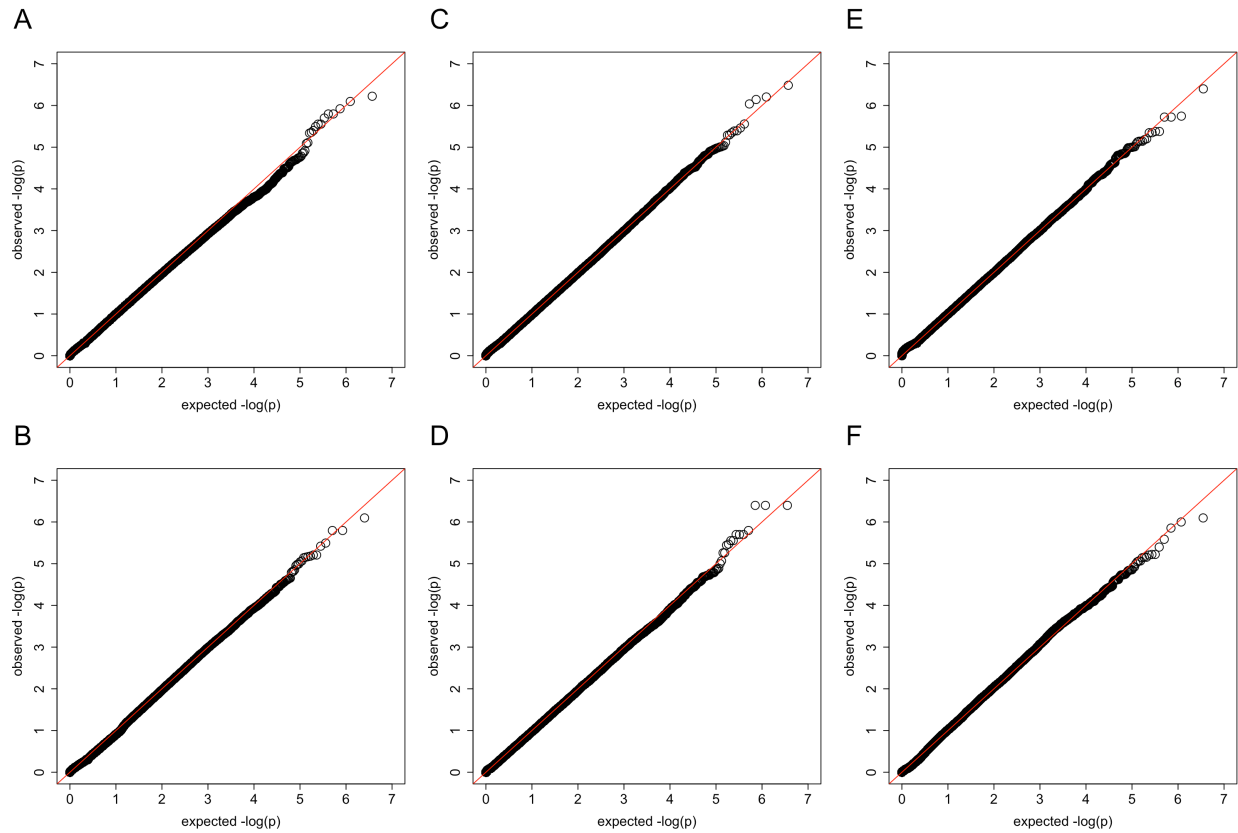

Figure S4. QQ plots for CHP-NPL<sub>All</sub> under the null hypothesis of no linkage

One-thousand replicates of exomes were generated under the null hypothesis of no linkage for 2,000 affected sib-pairs without missing genotype data (panel A); 2,000 affected sib-pairs with founders missing all exome data (panel B); 300 nuclear families with three affected siblings without missing genotype data (panel C); 300 nuclear families with three affected siblings with founders missing all exome data (panel D); 100 extended families without missing genotype data (panel E); and 100 extended families with founders missing all exome data (panel F); and analyzed using CHP-NPL<sub>All</sub> obtaining analytical p-values.

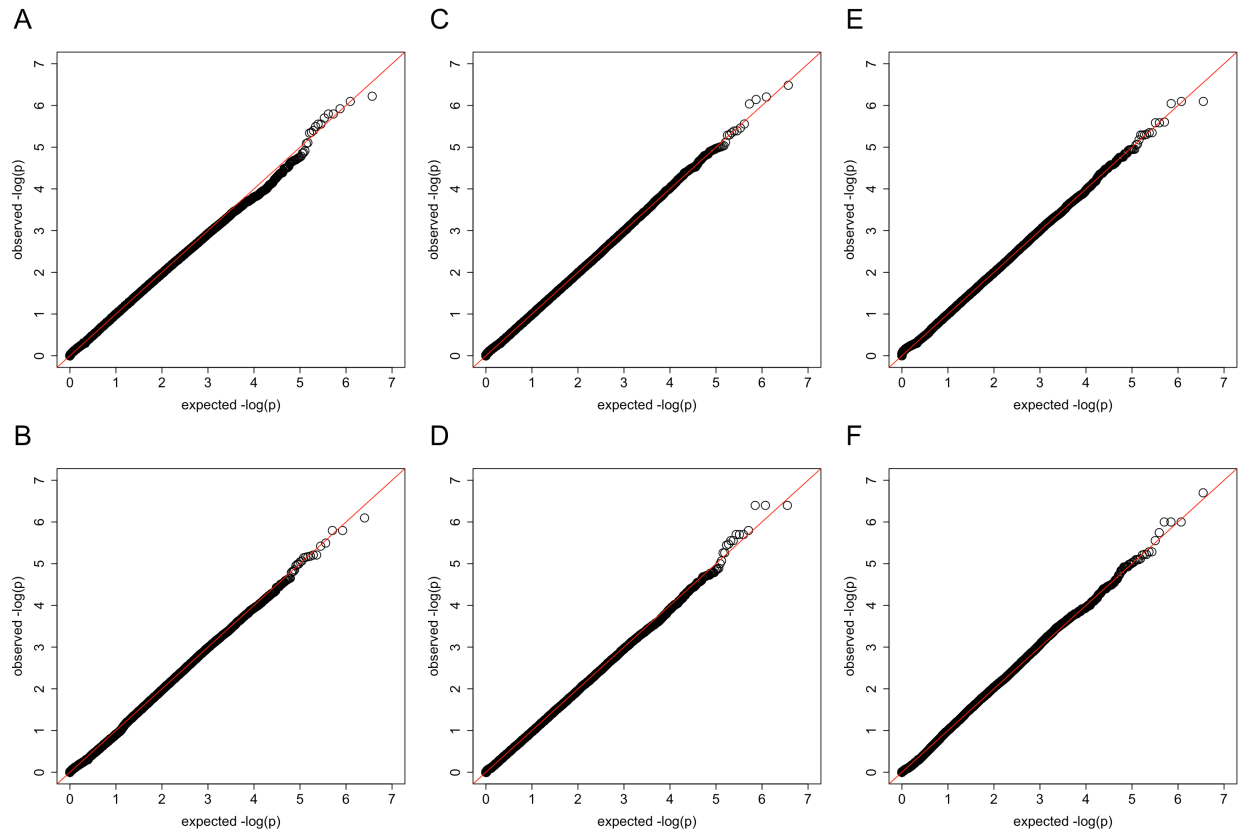

Figure S5. QQ plots for RV-NPL<sub>Pairs</sub> under the null hypothesis of no linkage

One-thousand replicates of exomes were generated under the null hypothesis of no linkage for 2,000 affected sib-pairs without missing genotype data (panel A); 2,000 affected sib-pairs with founders missing all exome data (panel B); 300 nuclear families with three affected siblings without missing genotype data (panel C); 300 nuclear families with three affected siblings with founders missing all exome data (panel D); 100 extended families without missing genotype data (panel E); and 100 extended families with founders missing all exome data (panel F); and analyzed using RV-NPL<sub>Pairs</sub> obtaining empirical p-values using 1,000,000 permutations. The observed plateau is due to the number of permutations performed.

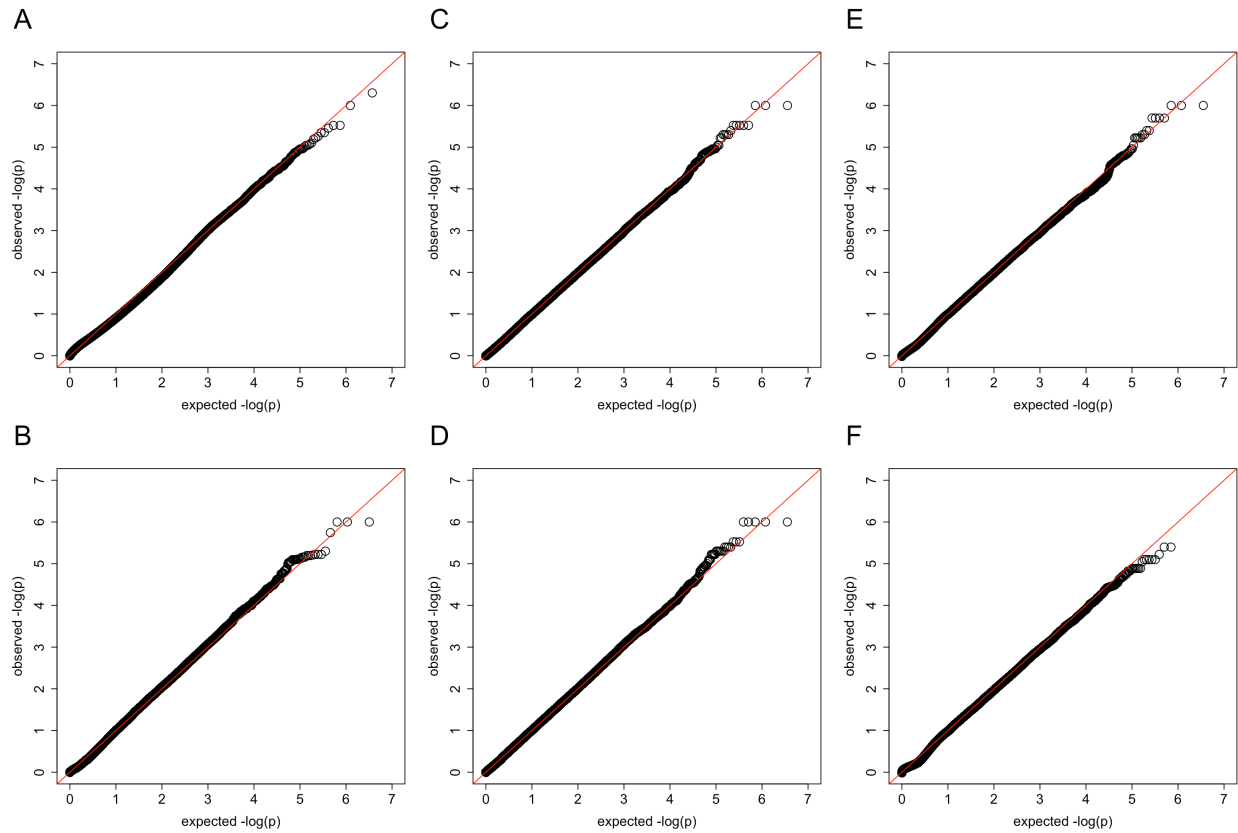

Figure S6. QQ plots for RV-NPL<sub>All</sub> under the null hypothesis of no linkage

One-thousand replicates of exomes were generated under the null hypothesis of no linkage for 2,000 affected sib-pairs without missing genotype data (panel A); 2,000 affected sib-pairs with founders missing all exome data (panel B); 300 nuclear families with three affected siblings without missing genotype data (panel C); 300 nuclear families with three affected siblings with founders missing all exome data (panel D); 100 extended families without missing genotype data (panel E); and 100 extended families with founders missing all exome data (panel F); and analyzed using RV-NPL<sub>All</sub> obtaining empirical p-values using 1,000,000 permutations. The observed plateau is due to the number of permutations performed.

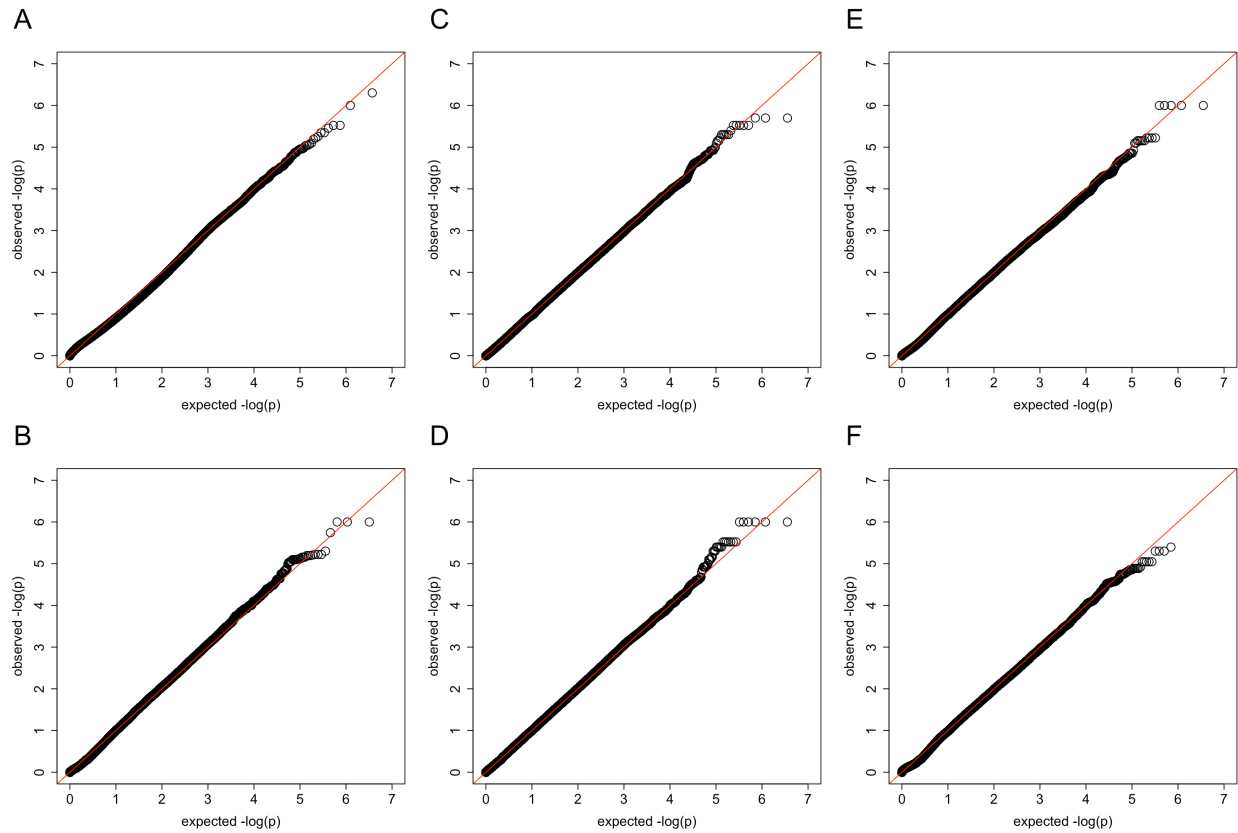

Figure S7. Power comparison for NPL<sub>Pairs</sub> for nuclear families with three affected siblings

Genotypes were generated for 300 nuclear families with three affected siblings conditional on affection status assuming a multiplicative model in which each causal variant within a gene region has an OR of 5.0. Analysis was performed using RV-NPL<sub>Pairs</sub>, CHP-NPL<sub>Pairs</sub>, and Multipoint-NPL<sub>Pairs</sub>: with 100%, 75% and 50% of the variant being causal and the remaining non-causal (OR=1.0) (panel A); with only causal nonsynonymous (NS) variants as well as with causal nonsynonymous (NS) and non-causal synonymous (S) variants (panel B); with 0%, 10%, 30%, and 50% of the founders missing all genotype data (panel C); and with no heterogeneity (NH), i.e. 300 linked families as well as with locus heterogeneity (H), i.e., 300 linked and 150 unlinked families (panel D).

**A**

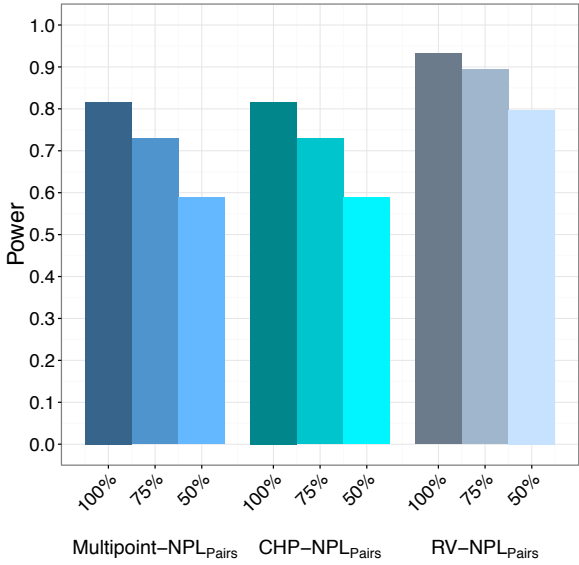

**B**

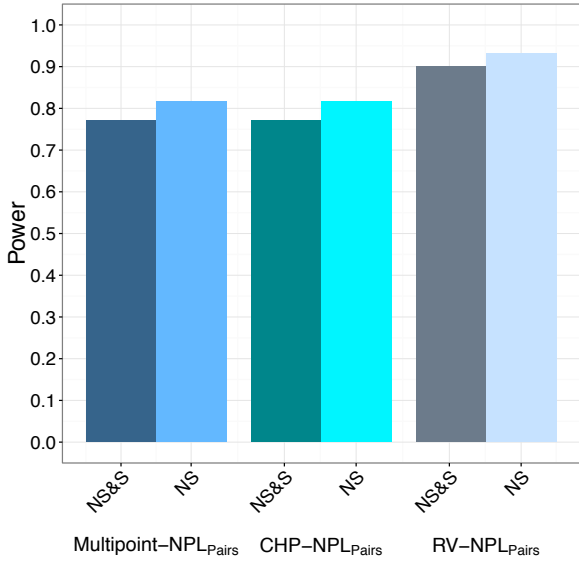

**C**

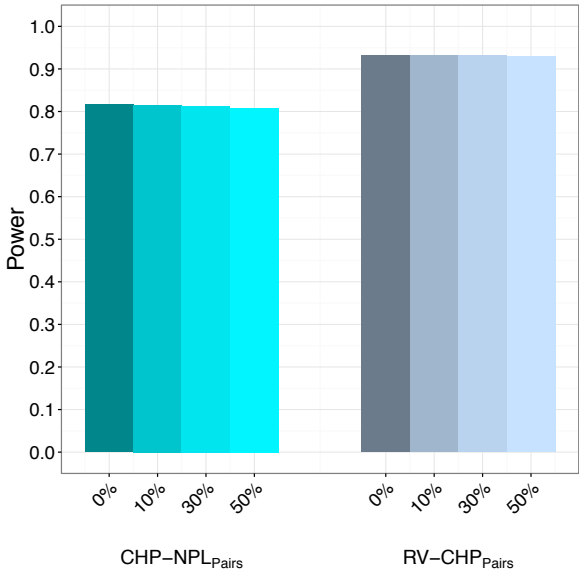

**D**

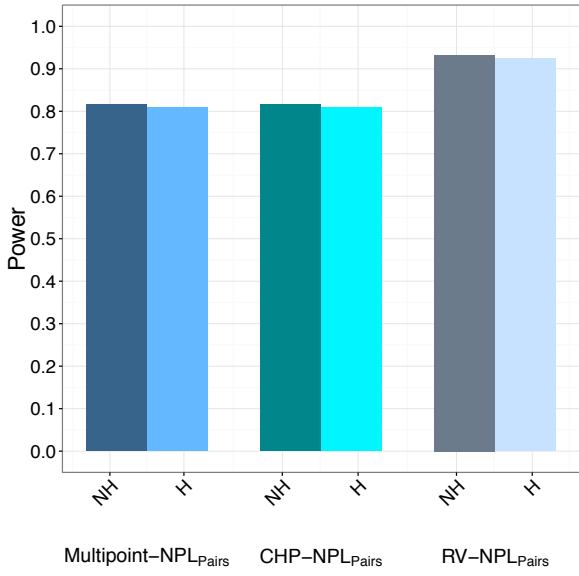

Figure S8. Power comparison for NPL<sub>Pairs</sub> on affected sibpairs

Genotypes were generated for 2,000 nuclear families with affected sibpairs conditional on affection status assuming a multiplicative model in which each causal variant within a gene region has an OR of 5.0. Analysis was performed using RV-NPL<sub>Pairs</sub>, CHP-NPL<sub>Pairs</sub>, and Multipoint-NPL<sub>Pairs</sub>: with 100%, 75% and 50% of the variant being causal and the remaining non-causal (OR=1.0) (panel A); with only causal nonsynonymous (NS) variants as well as with causal nonsynonymous (NS) and non-causal synonymous (S) variants (panel B); with 0%, 10%, 30%, and 50% of the founders missing all genotype data (panel C); and with no heterogeneity (NH), i.e. 2,000 linked families as well as with locus heterogeneity (H), i.e., 2,000 linked and 1,000 unlinked families (panel D).

**A**

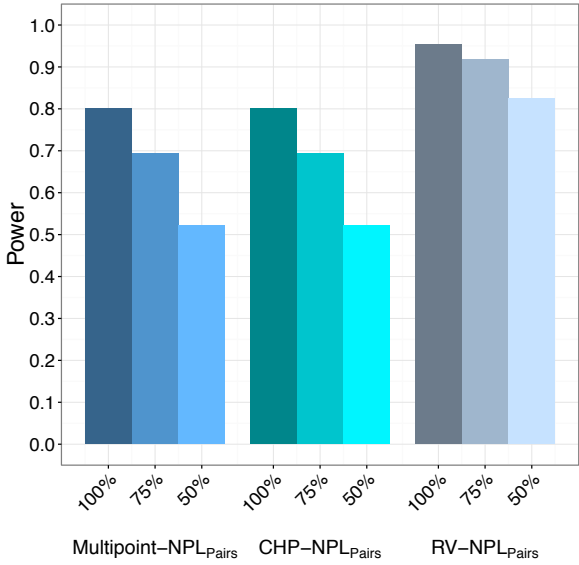

**B**

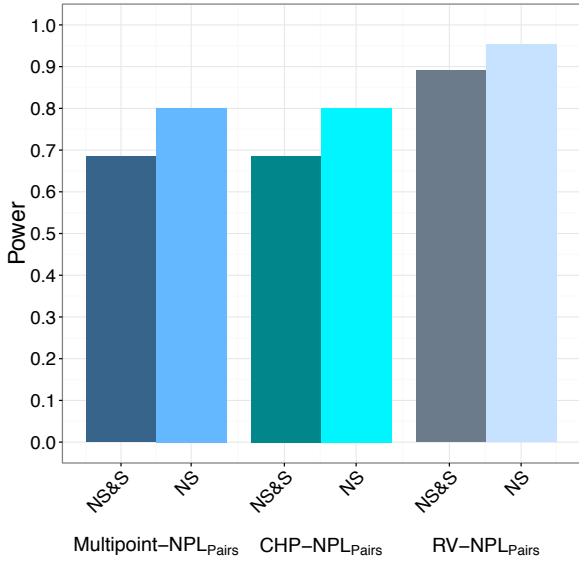

**C**

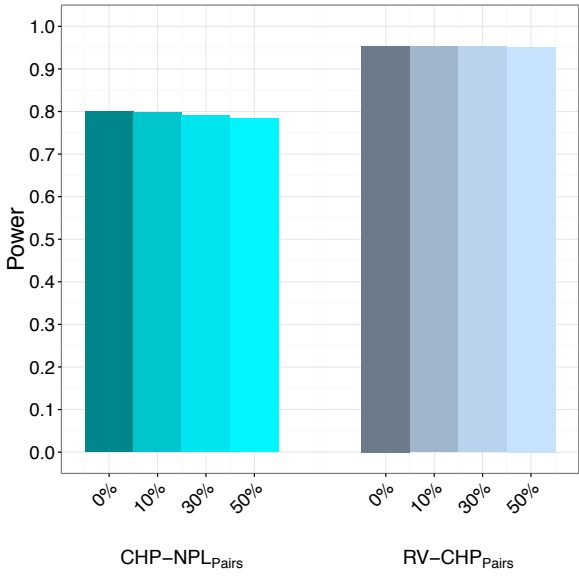

**D**

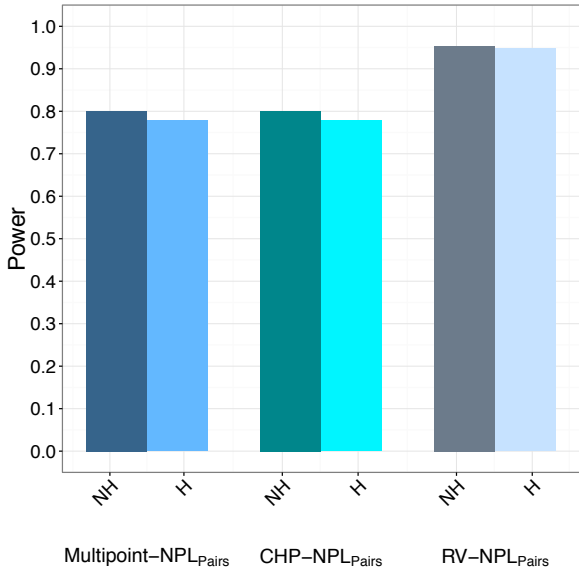

Figure S9. Power comparison for NPL<sub>AII</sub> on extended families

Genotypes were generated for 100 extended families conditional on affection status assuming a multiplicative model in which each causal variant within a gene region has an OR of 5.0. Analysis was performed using RV-NPL<sub>AII</sub>, CHP-NPL<sub>AII</sub>, and Multipoint-NPL<sub>AII</sub>: with 100%, 75% and 50% of the variant being causal and the remaining non-causal (OR=1.0) (panel A); with only causal nonsynonymous (NS) variants as well as with causal nonsynonymous (NS) and non-causal synonymous (S) variants (panel B); with 0%, 10%, 30%, and 50% of the founders missing all genotype data (panel C); and with no heterogeneity (NH), i.e. 100 linked families as well as with locus heterogeneity (H), i.e., 100 linked and 50 unlinked families (panel D).

**A**

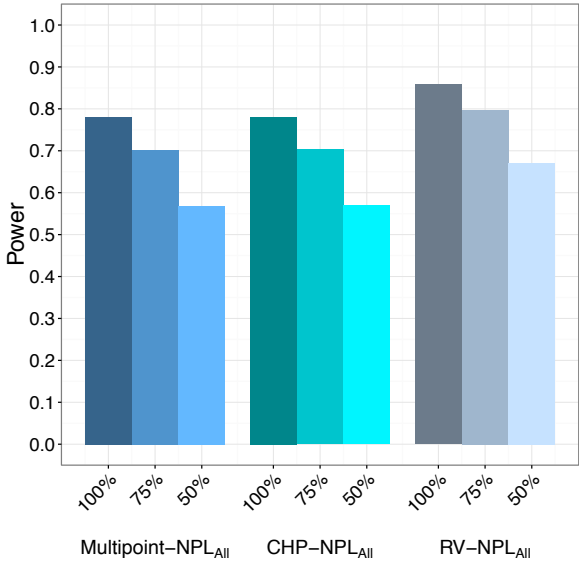

**B**

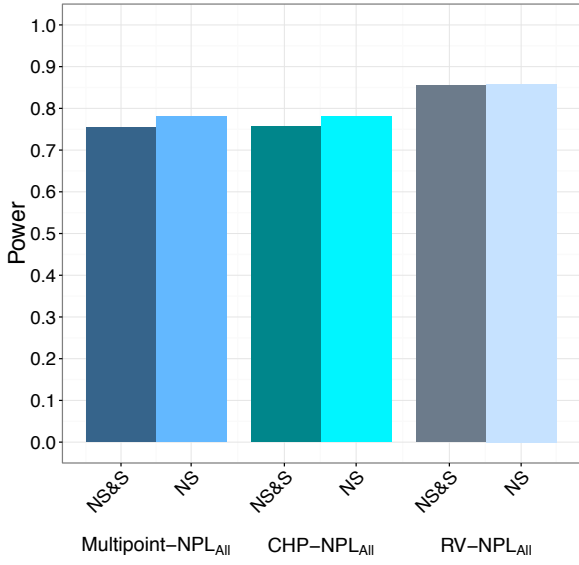

**C**

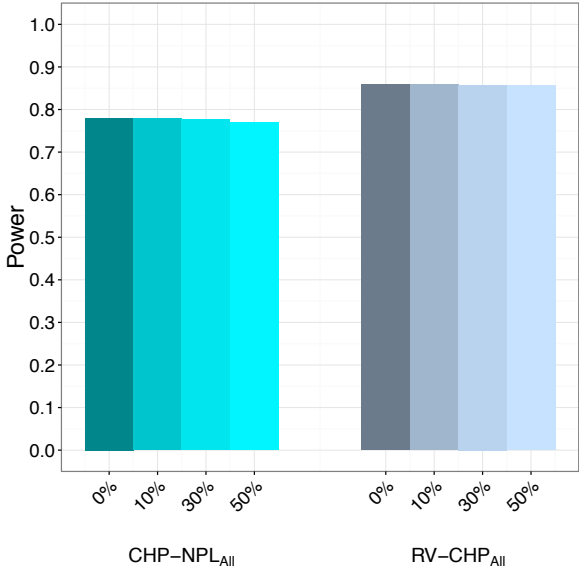

**D**

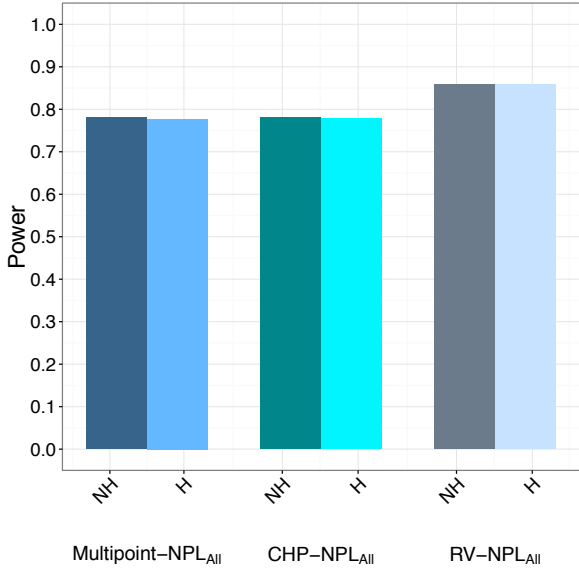

Figure S10. Power comparison for NPL<sub>All</sub> on nuclear families with three affected siblings

Genotypes were generated for 300 nuclear families with three affected siblings conditional on affection status assuming a multiplicative model in which each causal variant within a gene region has an OR of 5.0. Analysis was performed using RV-NPL<sub>All</sub>, CHP-NPL<sub>All</sub>, and Multipoint-NPL<sub>All</sub>: with 100%, 75% and 50% of the variant being causal and the remaining non-causal (OR=1.0) (panel A); with only causal nonsynonymous (NS) variants as well as with causal nonsynonymous (NS) and non-causal synonymous (S) variants (panel B); with 0%, 10%, 30%, and 50% of the founders missing all genotype data (panel C); and with no heterogeneity (NH), i.e. 100 linked families as well as with locus heterogeneity (H), i.e., 300 linked and 150 unlinked families (panel D).

**A**

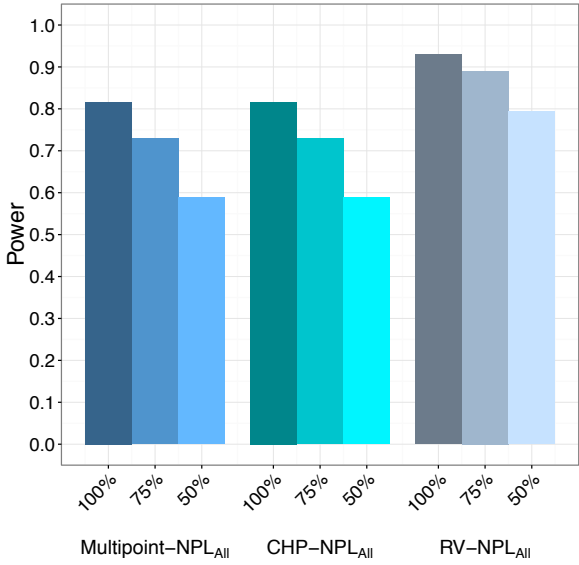

**B**

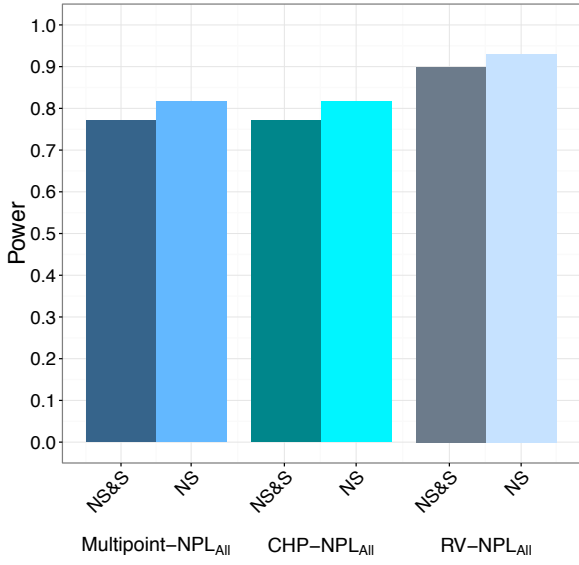

**C**

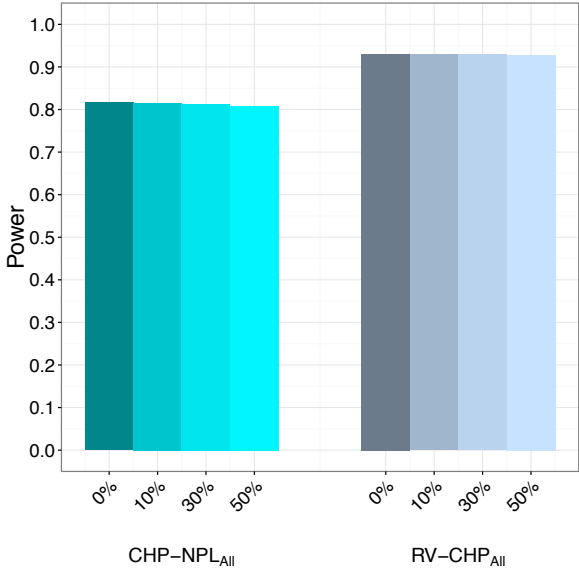

**D**

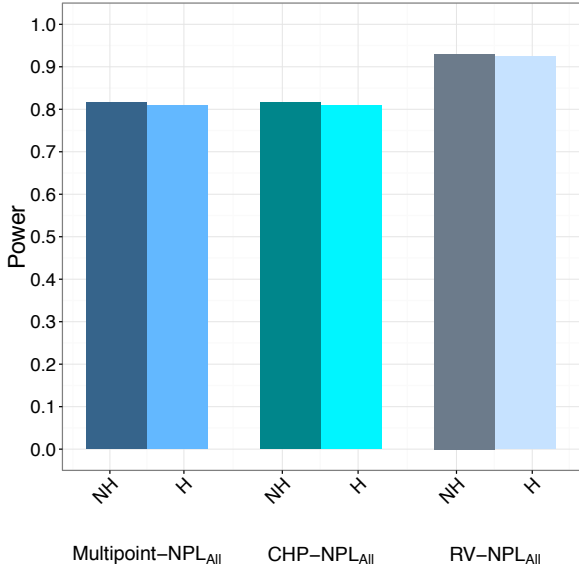

**Table S1: The Ethnicities of Alzheimer's disease families included in the analysis**

| Ethnicity        | Number of Families | Family IDs                                                                                                                                                                                                                                                                                                                                                                                                                                                                                                                                                                                                                                                                                                                                                                                                                                                                                                                                                                                                                                                                                  |
|------------------|--------------------|---------------------------------------------------------------------------------------------------------------------------------------------------------------------------------------------------------------------------------------------------------------------------------------------------------------------------------------------------------------------------------------------------------------------------------------------------------------------------------------------------------------------------------------------------------------------------------------------------------------------------------------------------------------------------------------------------------------------------------------------------------------------------------------------------------------------------------------------------------------------------------------------------------------------------------------------------------------------------------------------------------------------------------------------------------------------------------------------|
| Dominican        | 62                 | CU0002F, CU0003F <sup>a</sup> , CU0004F <sup>^</sup> , CU0005F <sup>a</sup> , CU0006F <sup>*a</sup> , CU0007F, CU0008F, CU0009F <sup>c</sup> , CU0010F, CU0012F, CU0013F <sup>a</sup> , CU0014F, CU0015F, CU0016F <sup>a</sup> , CU0017F <sup>^</sup> , CU0018F, CU0019F <sup>^a</sup> , CU0020F, CU0022F, CU0023F <sup>*</sup> , CU0024F, CU0025F, CU0026F, CU0029F, CU0030F <sup>*a</sup> , CU0033F, CU0035F <sup>^</sup> , CU0036F, CU0037F, CU0038F <sup>*</sup> , CU0039F <sup>a</sup> , CU0040F <sup>a</sup> , CU0041F <sup>a</sup> , CU0043F <sup>c</sup> , CU0044F <sup>a</sup> , CU0045F <sup>c</sup> , CU0046F, CU0047F, CU0048F <sup>^</sup> , CU0049F <sup>*</sup> , CU0050F, CU0052F, CU0053F, CU0055F <sup>^</sup> , CU0057F, CU0058F, CU0059F, CU0060F <sup>a</sup> , CU0064F <sup>a</sup> , CU0065F, CU0067F <sup>*a</sup> , CU0068F <sup>^</sup> , CU0070F <sup>^a</sup> , CU0071F <sup>a</sup> , CU0073F <sup>^a</sup> , CU0075F <sup>^</sup> , CU0076F <sup>*</sup> , CU0078F <sup>a</sup> , CU0079F <sup>^</sup> , CU0081F <sup>a</sup> , CU0082F, CU0083F <sup>a</sup> |
| European Descent | 41                 | LD0168F, LD0179F, LD0223F, LD0232F, LD0241F <sup>d</sup> , LD0254F, LD0307F, LD0856F, LD0949F, LD1012F <sup>d</sup> , LD1223F, LD1260F, LD1265F, LD1315F <sup>b</sup> , LD1329F <sup>*</sup> , LD1579F <sup>d</sup> , NC0049F, NC0131F, NC0205F <sup>^</sup> , NC0302F, UM0002F, UM0146F <sup>^b</sup> , UM0147F <sup>d</sup> , UM0152F, UM0170F, UM0196F <sup>d</sup> , UM0304F, UM0453F, UM0458F, UM0460F, UM0463F <sup>^b</sup> , UM0464F, UP0001F, UP0002F, UP0003F, UP0004F <sup>d</sup> , UP0005F, UP0006F, UP0007F, UP0008F, VU0072F                                                                                                                                                                                                                                                                                                                                                                                                                                                                                                                                                 |
| Puerto Rican     | 3                  | CU0032F, CU0042F, CU0051F                                                                                                                                                                                                                                                                                                                                                                                                                                                                                                                                                                                                                                                                                                                                                                                                                                                                                                                                                                                                                                                                   |
| Dutch Isolate    | 1                  | 203 <sup>d</sup>                                                                                                                                                                                                                                                                                                                                                                                                                                                                                                                                                                                                                                                                                                                                                                                                                                                                                                                                                                                                                                                                            |

<sup>^</sup>Pedigrees with excess RV sharing for gene *PSMF1*.

<sup>\*</sup>Pedigrees with excess RV sharing for gene *PTPN21*.

<sup>a</sup>Pedigrees with excess RV sharing for gene *ABCA7*; <sup>b</sup>Pedigrees with excess RV sharing for gene *ACE*;

<sup>c</sup>Pedigrees with excess RV sharing for gene *EPHA1*; <sup>d</sup>Pedigrees with excess RV sharing for gene *SORL1*.

**Table S2. Type I error rate of CHP-NPL and RV-NPL at  $\alpha$ -level of 0.05 and 0.005**

|                               | $\alpha$ -level          | Nuclear pedigree with two affected siblings |                      |                      | Nuclear pedigree with three affected siblings |                      |                      | Extended pedigree    |                      |                      |
|-------------------------------|--------------------------|---------------------------------------------|----------------------|----------------------|-----------------------------------------------|----------------------|----------------------|----------------------|----------------------|----------------------|
|                               |                          | $5.0 \times 10^{-2}$                        | $5.0 \times 10^{-3}$ | $1.5 \times 10^{-5}$ | $5 \times 10^{-2}$                            | $5.0 \times 10^{-3}$ | $1.5 \times 10^{-5}$ | $5.0 \times 10^{-2}$ | $5.0 \times 10^{-3}$ | $1.5 \times 10^{-5}$ |
| No missing genotype           | CHP-NPL <sub>Pairs</sub> | $4.8 \times 10^{-2}$                        | $4.5 \times 10^{-3}$ | $1.0 \times 10^{-5}$ | $4.9 \times 10^{-2}$                          | $4.8 \times 10^{-3}$ | $1.5 \times 10^{-5}$ | $5.0 \times 10^{-2}$ | $5.0 \times 10^{-3}$ | $1.5 \times 10^{-5}$ |
|                               | CHP-NPL <sub>All</sub>   | $4.8 \times 10^{-2}$                        | $4.5 \times 10^{-3}$ | $1.0 \times 10^{-5}$ | $4.9 \times 10^{-2}$                          | $4.8 \times 10^{-3}$ | $1.5 \times 10^{-5}$ | $5.0 \times 10^{-2}$ | $4.9 \times 10^{-3}$ | $1.3 \times 10^{-5}$ |
|                               | RV-NPL <sub>Pairs</sub>  | $4.6 \times 10^{-2}$                        | $4.3 \times 10^{-3}$ | $1.4 \times 10^{-5}$ | $4.9 \times 10^{-2}$                          | $4.8 \times 10^{-3}$ | $1.7 \times 10^{-5}$ | $4.9 \times 10^{-2}$ | $4.8 \times 10^{-3}$ | $1.7 \times 10^{-5}$ |
|                               | RV-NPL <sub>All</sub>    | $4.6 \times 10^{-2}$                        | $4.3 \times 10^{-3}$ | $1.4 \times 10^{-5}$ | $4.9 \times 10^{-2}$                          | $4.9 \times 10^{-3}$ | $1.6 \times 10^{-5}$ | $4.9 \times 10^{-2}$ | $4.9 \times 10^{-3}$ | $1.0 \times 10^{-5}$ |
| All founders missing genotype | CHP-NPL <sub>Pairs</sub> | $4.6 \times 10^{-2}$                        | $4.8 \times 10^{-3}$ | $1.4 \times 10^{-5}$ | $4.6 \times 10^{-2}$                          | $4.5 \times 10^{-3}$ | $1.0 \times 10^{-5}$ | $5.1 \times 10^{-2}$ | $5.3 \times 10^{-3}$ | $1.4 \times 10^{-5}$ |
|                               | CHP-NPL <sub>All</sub>   | $4.6 \times 10^{-2}$                        | $4.8 \times 10^{-3}$ | $1.4 \times 10^{-5}$ | $4.6 \times 10^{-2}$                          | $4.5 \times 10^{-3}$ | $1.0 \times 10^{-5}$ | $5.1 \times 10^{-2}$ | $5.2 \times 10^{-3}$ | $1.7 \times 10^{-5}$ |
|                               | RV-NPL <sub>Pairs</sub>  | $5.1 \times 10^{-2}$                        | $5.2 \times 10^{-3}$ | $1.7 \times 10^{-5}$ | $5.1 \times 10^{-2}$                          | $5.2 \times 10^{-3}$ | $1.7 \times 10^{-5}$ | $4.9 \times 10^{-2}$ | $4.6 \times 10^{-3}$ | $1.5 \times 10^{-5}$ |
|                               | RV-NPL <sub>All</sub>    | $5.1 \times 10^{-2}$                        | $5.2 \times 10^{-3}$ | $1.7 \times 10^{-5}$ | $5.1 \times 10^{-2}$                          | $5.2 \times 10^{-3}$ | $1.6 \times 10^{-5}$ | $5.0 \times 10^{-2}$ | $4.8 \times 10^{-3}$ | $1.5 \times 10^{-5}$ |

Exome-wide type I error was evaluated using data generated for 1000 exomes and analyzing each gene. Three different values for  $\alpha$ -level are shown here:  $5.0 \times 10^{-2}$ ,  $5.0 \times 10^{-3}$  and  $1.5 \times 10^{-5}$ . Type I error rate was calculated by dividing the total number of genes with a p-value equal or smaller than the  $\alpha$ -level value by the number of genes analyzed across all 1000 generated exomes.

| <b>Table S3. Power comparison of <math>NPL_{Pairs}</math> and <math>NPL_{All}</math> in intra-familial locus heterogeneity</b>           |                  |                |                         |
|------------------------------------------------------------------------------------------------------------------------------------------|------------------|----------------|-------------------------|
|                                                                                                                                          | $RV-NPL_{Pairs}$ | $RV-NPL_{All}$ | $Z_{All} > Z_{Pairs}^a$ |
| Without intra-familial locus heterogeneity                                                                                               | 0.6410           | 0.6411         | 69.08%                  |
| With intra-familial locus heterogeneity                                                                                                  | 0.2997           | 0.2870         | 38.52%                  |
| Power was compared between $RV-NPL_{Pairs}$ and $RV-NPL_{All}$ in extended families with and without intra-familial locus heterogeneity. |                  |                |                         |
| <sup>a</sup> Proportion of total genes that have Z-scores of $RV-NPL_{All}$ higher than that of $RV-NPL_{Pairs}$                         |                  |                |                         |

**Table S4: Bioinformatic evaluation and frequencies of analyzed rare variants within *PSMF1***

|                         |                       |                       |                       |                       |                       |                       |                       |                       |
|-------------------------|-----------------------|-----------------------|-----------------------|-----------------------|-----------------------|-----------------------|-----------------------|-----------------------|
| dbSNP rsID              | rs751905514**         | rs35236223**          | rs148476395*          | rs146300768^          | rs146612629           | rs79465651*           | rs148156083**         | rs758812434*          |
| hg19 position           | 20:1106192            | 20:1106214            | 20:1115798            | 20:1115864            | 20:1115870            | 20:1143797            | 20:1145081            | 20:1145111            |
| Reference Allele        | A                     | G                     | A                     | C                     | T                     | T                     | G                     | G                     |
| Alternate Allele        | G                     | A                     | G                     | T                     | A                     | C                     | A                     | A                     |
| cDNA change             | c.181A>G              | c.203G>A              | c.400A>G              | c.466C>T              | c.472T>A              | c.575T>C              | c.725G>A              | c.755G>A              |
| ACC                     | p.Asn61Asp            | p.Arg68Gln            | p.Ile134Val           | p.Arg156Trp           | p.Phe158Ile           | p.Val192Ala           | p.Arg242His           | p.Ser252Asn           |
| MAF <sup>a</sup>        | 7.22x10 <sup>-6</sup> | 3.61x10 <sup>-5</sup> | 6.90x10 <sup>-5</sup> | 4.08x10 <sup>-4</sup> | 2.78x10 <sup>-4</sup> | 5.61x10 <sup>-3</sup> | 1.49x10 <sup>-3</sup> | 3.66x10 <sup>-5</sup> |
| MAF (NFE) <sup>b</sup>  | 1.58x10 <sup>-5</sup> | 3.16x10 <sup>-5</sup> | 1.07x10 <sup>-4</sup> | 5.53x10 <sup>-5</sup> | 3.95x10 <sup>-4</sup> | 7.26x10 <sup>-4</sup> | 2.50x10 <sup>-3</sup> | 0                     |
| MAF (AMR) <sup>c</sup>  | 0                     | 2.91x10 <sup>-5</sup> | 5.96x10 <sup>-5</sup> | 3.20x10 <sup>-4</sup> | 5.23x10 <sup>-4</sup> | 3.31x10 <sup>-3</sup> | 9.30x10 <sup>-4</sup> | 0                     |
| GERP score              | 4.93                  | 4.93                  | 4.12                  | 2.07                  | 5.03                  | 5.26                  | 5.11                  | 4.12                  |
| PhyloP score            | 3.37                  | 6.37                  | 2.02                  | 0.27                  | 0.81                  | 4.56                  | 8.44                  | 3.37                  |
| CADD score <sup>d</sup> | 18.7                  | 34.0                  | 6.0                   | 23.9                  | 22.6                  | 12.7                  | 28.4                  | 12.1                  |
| FATHMM                  | tolerated             |
| MutationTaster          | disease causing       | disease causing       | disease causing       | polymorphism          | disease causing       | polymorphism          | disease causing       | polymorphism          |
| Polyphen-2 HVAR         | possibly<br>damaging  | probably<br>damaging  | benign                | probably<br>damaging  | benign                | benign                | benign                | benign                |
| PROVEAN                 | neutral               | deleterious           | neutral               | deleterious           | neutral               | neutral               | deleterious           | neutral               |
| SIFT                    | tolerated             | damaging              | tolerated             | damaging              | tolerated             | tolerated             | tolerated             | tolerated             |
| LRT                     | deleterious           | deleterious           | deleterious           | neutral               | neutral               | neutral               | deleterious           | deleterious           |

Abbreviations: ACC, amino acid change; MAF, minor allele frequency; NFE, Non-Finnish European; AMR, Latino; CADD, Combined Annotation Dependent Depletion; FATHMM, Functional Analysis through Hidden Markov Models; PROVEAN, Protein Variation Effect Analyzer; SIFT, Sorting Intolerant From Tolerant.

<sup>a</sup>MAFs are from gnomAD (Genome Aggregation Database) combining all populations; <sup>b</sup>MAFs are from gnomAD NFE population; <sup>c</sup>MAFs are from gnomAD AMR population;

<sup>d</sup>Scaled CADD score.

\*Variant is deemed as conserved nucleotide (both GERP and PhyloP scores > 1).

^Variant is deemed damaging by at least four of seven bioinformatics tools (variant with CADD scaled C-score >15 is deemed to be deleterious).

**Table S5: Bioinformatic evaluation and frequencies of analyzed rare variants within *PTPN21***

|                         |                       |                       |                       |                       |                       |                       |                       |
|-------------------------|-----------------------|-----------------------|-----------------------|-----------------------|-----------------------|-----------------------|-----------------------|
| dbSNP rsID              | rs141951135**         | rs150736820**         | rs143571855           | rs3825676**           | rs149927113           | rs138752198*          | rs146847601**         |
| hg19 position           | 14:88935348           | 14:88935351           | 14:88945312           | 14:88945407           | 14:88945485           | 14:88974290           | 14:89016641           |
| Reference Allele        | G                     | G                     | G                     | C                     | C                     | T                     | C                     |
| Alternate Allele        | A                     | A                     | C                     | G                     | G                     | C                     | A                     |
| cDNA change             | c.3308C>T             | c.3305C>T             | c.2463C>G             | c.2368G>C             | c.2290G>C             | c.425A>G              | c.121G>T              |
| ACC                     | p.Pro1103Leu          | p.Pro1102Leu          | p.Asp821Glu           | p.Gly790Arg           | p.Val764Leu           | p.Gln142Arg           | p.Val41Leu            |
| MAF <sup>a</sup>        | 5.41x10 <sup>-5</sup> | 1.61x10 <sup>-3</sup> | 1.95x10 <sup>-3</sup> | 1.84x10 <sup>-2</sup> | 2.17x10 <sup>-4</sup> | 3.58x10 <sup>-4</sup> | 4.94x10 <sup>-4</sup> |
| MAF (NFE) <sup>b</sup>  | 3.58x10 <sup>-5</sup> | 2.73x10 <sup>-3</sup> | 1.85x10 <sup>-5</sup> | 1.95x10 <sup>-2</sup> | 0                     | 6.00x10 <sup>-4</sup> | 7.90x10 <sup>-6</sup> |
| MAF (AMR) <sup>c</sup>  | 2.08x10 <sup>-4</sup> | 1.16x10 <sup>-4</sup> | 7.87x10 <sup>-4</sup> | 3.86x10 <sup>-3</sup> | 3.74x10 <sup>-5</sup> | 2.06x10 <sup>-4</sup> | 1.16x10 <sup>-4</sup> |
| GERP score              | 5.90                  | 5.90                  | -6.17                 | 4.66                  | -2.01                 | 5.36                  | 5.50                  |
| PhyloP score            | 9.48                  | 3.71                  | -1.29                 | 5.10                  | 0.88                  | 2.42                  | 7.60                  |
| CADD score <sup>d</sup> | 34.0                  | 22.9                  | 0.04                  | 19.8                  | 0.1                   | 7.9                   | 23.6                  |
| FATHMM                  | tolerated             |
| MutationTaster          | disease causing       | disease causing       | polymorphism          | disease causing       | polymorphism          | disease causing       | disease causing       |
| Polyphen-2 HVAR         | probably damaging     | benign                | benign                | probably damaging     | benign                | benign                | probably damaging     |
| PROVEAN                 | deleterious           | deleterious           | neutral               | neutral               | neutral               | neutral               | neutral               |
| SIFT                    | damaging              | damaging              | tolerated             | damaging              | tolerated             | tolerated             | tolerated             |
| LRT                     | deleterious           | deleterious           | deleterious           | deleterious           | neutral               | neutral               | deleterious           |

Abbreviations: ACC, amino acid change; MAF, minor allele frequency; NFE, Non-Finnish European; AMR, Latino; CADD, Combined Annotation Dependent Depletion; FATHMM, Functional Analysis through Hidden Markov Models; PROVEAN, Protein Variation Effect Analyzer; SIFT, Sorting Intolerant From Tolerant.

<sup>a</sup>MAFs are from gnomAD (Genome Aggregation Database) combining all populations; <sup>b</sup>MAFs are from gnomAD NFE population; <sup>c</sup>MAFs are from gnomAD AMR population;

<sup>d</sup>Scaled CADD score.

\*Variant is deemed as conserved nucleotide (both GERP and PhyloP scores > 1).

^Variant is deemed damaging by at least four of seven bioinformatics tools (variant with CADD scaled C-score >15 is deemed to be deleterious).

**Table S6: Bioinformatic evaluation and frequencies of analyzed rare variants within *ABCA7***

|                         |                       |                       |                      |                       |                         |                           |                          |
|-------------------------|-----------------------|-----------------------|----------------------|-----------------------|-------------------------|---------------------------|--------------------------|
| dbSNP rsID              | rs146597357           | rs151054304           | NA <sup>**</sup>     | rs138055574           | rs76282929 <sup>^</sup> | rs149949633 <sup>**</sup> | rs111940546 <sup>*</sup> |
| hg19 position           | 19:1041922            | 19:1042353            | 19:1043175           | 19:1044672            | 19:1048898              | 19:1048950                | 19:1051209               |
| Reference Allele        | C                     | C                     | A                    | G                     | G                       | G                         | G                        |
| Alternate Allele        | A                     | T                     | G                    | A                     | C                       | A                         | T                        |
| cDNA change             | c.253C>A              | c.455C>T              | c.715A>G             | c.1144G>A             | c.2274G>C               | c.2326G>A                 | c.2740G>T                |
| ACC                     | p.Leu85Met            | p.Pro152Leu           | p.Asn239Asp          | p.Gly382Ser           | p.Gln758His             | p.Gly776Arg               | p.Ala914Ser              |
| MAF <sup>a</sup>        | 3.08x10 <sup>-4</sup> | 1.42x10 <sup>-3</sup> | .                    | 5.34x10 <sup>-5</sup> | 4.28x10 <sup>-3</sup>   | 1.13x10 <sup>-4</sup>     | 1.86x10 <sup>-4</sup>    |
| MAF (NFE) <sup>b</sup>  | 4.95x10 <sup>-5</sup> | 2.44x10 <sup>-5</sup> | .                    | 2.38x10 <sup>-5</sup> | 6.58x10 <sup>-5</sup>   | 1.95x10 <sup>-4</sup>     | 0                        |
| MAF (AMR) <sup>c</sup>  | 2.41x10 <sup>-4</sup> | 7.63x10 <sup>-4</sup> | .                    | 0                     | 1.59x10 <sup>-3</sup>   | 8.91x10 <sup>-5</sup>     | 1.75x10 <sup>-4</sup>    |
| GERP score              | 1.68                  | 2.06                  | 3.04                 | 2.83                  | 3.99                    | 3.99                      | 3.4                      |
| PhyloP score            | 0.83                  | -0.85                 | 2.17                 | 0.73                  | -5.34                   | 6.44                      | 1.39                     |
| CADD score <sup>d</sup> | 13.4                  | 7.4                   | 20.4                 | 8.8                   | 25.3                    | 28.6                      | 8.16                     |
| FATHMM                  | damaging              | damaging              | damaging             | damaging              | damaging                | tolerated                 | tolerated                |
| MutationTaster          | polymorphism          | polymorphism          | polymorphism         | polymorphism          | polymorphism            | disease causing           | polymorphism             |
| Polyphen-2 HVAR         | benign                | benign                | probably<br>damaging | benign                | probably<br>damaging    | probably<br>damaging      | benign                   |
| PROVEAN                 | neutral               | neutral               | deleterious          | neutral               | deleterious             | deleterious               | neutral                  |
| SIFT                    | tolerated             | tolerated             | damaging             | tolerated             | damaging                | damaging                  | tolerated                |
| LRT                     | .                     | .                     | .                    | .                     | .                       | .                         | .                        |

Abbreviations: ACC, amino acid change; MAF, minor allele frequency; NFE, Non-Finnish European; AMR, Latino; CADD, Combined Annotation Dependent Depletion; FATHMM, Functional Analysis through Hidden Markov Models; PROVEAN, Protein Variation Effect Analyzer; SIFT, Sorting Intolerant From Tolerant.

<sup>a</sup>MAFs are from gnomAD (Genome Aggregation Database) combining all populations; <sup>b</sup>MAFs are from gnomAD NFE population; <sup>c</sup>MAFs are from gnomAD AMR population; <sup>d</sup>Scaled CADD score.

\*Variant is deemed as conserved nucleotide (both GERP and PhyloP scores > 1).

<sup>^</sup>Variant is deemed damaging by at least four of seven bioinformatics tools (variant with CADD scaled C-score >15 is deemed to be deleterious).

**Table S6: Bioinformatic evaluation and frequencies of analyzed rare variants within ABCA7 (continued)**

|                         |                       |                       |                       |                       |                       |                       |
|-------------------------|-----------------------|-----------------------|-----------------------|-----------------------|-----------------------|-----------------------|
| dbSNP rsID              | rs947668738*          | rs114614802^          | rs369849959           | rs184590335**         | rs73505232**          | rs114782266^          |
| hg19 position           | 19:1053401            | 19:1054324            | 19:1056127            | 19:1057919            | 19:1058635            | 19:1059056            |
| Reference Allele        | G                     | G                     | G                     | C                     | C                     | G                     |
| Alternate Allele        | C                     | A                     | A                     | T                     | T                     | A                     |
| cDNA change             | c.3294G>C             | c.3710G>A             | c.4301G>A             | c.4886C>T             | c.5168C>T             | c.5435G>A             |
| ACC                     | p.Glu1098Asp          | p.Arg1237His          | p.Arg1434His          | p.Ser1629Leu          | p.Ser1723Leu          | p.Arg1812His          |
| MAF <sup>a</sup>        | 6.37x10 <sup>-5</sup> | 2.38x10 <sup>-3</sup> | 2.52x10 <sup>-5</sup> | 1.29x10 <sup>-3</sup> | 1.21x10 <sup>-2</sup> | 1.06x10 <sup>-2</sup> |
| MAF (NFE) <sup>b</sup>  | 0                     | 2.49x10 <sup>-5</sup> | 1.60x10 <sup>-5</sup> | 0                     | 1.74x10 <sup>-4</sup> | 6.41x10 <sup>-3</sup> |
| MAF (AMR) <sup>c</sup>  | 1.19x10 <sup>-3</sup> | 1.03x10 <sup>-3</sup> | 8.76x10 <sup>-5</sup> | 9.47x10 <sup>-3</sup> | 5.01x10 <sup>-3</sup> | 5.35x10 <sup>-3</sup> |
| GERP score              | 1.25                  | 3.64                  | -2.23                 | 4.22                  | 4.23                  | 0.81                  |
| PhyloP score            | 2.42                  | 0.36                  | -0.98                 | 7.64                  | 2.03                  | 4.26                  |
| CADD score <sup>d</sup> | 22.9                  | 32.0                  | 2.8                   | 35.0                  | 33.0                  | 21.8                  |
| FATHMM                  | tolerated             | damaging              | damaging              | damaging              | damaging              | damaging              |
| MutationTaster          | polymorphism          | polymorphism          | polymorphism          | disease causing       | polymorphism          | polymorphism          |
| Polyphen-2 HVAR         | benign                | probably damaging     | benign                | benign                | benign                | benign                |
| PROVEAN                 | neutral               | deleterious           | neutral               | deleterious           | deleterious           | deleterious           |
| SIFT                    | tolerated             | damaging              | tolerated             | damaging              | damaging              | damaging              |
| LRT                     | .                     | .                     | .                     | .                     | .                     | .                     |

Abbreviations: ACC, amino acid change; MAF, minor allele frequency; NFE, Non-Finnish European; AMR, Latino; CADD, Combined Annotation Dependent Depletion; FATHMM, Functional Analysis through Hidden Markov Models; PROVEAN, Protein Variation Effect Analyzer; SIFT, Sorting Intolerant From Tolerant.

<sup>a</sup>MAFs are from gnomAD (Genome Aggregation Database) combining all populations; <sup>b</sup>MAFs are from gnomAD NFE population; <sup>c</sup>MAFs are from gnomAD AMR population; <sup>d</sup>Scaled CADD score.

\*Variant is deemed as conserved nucleotide (both GERP and PhyloP scores > 1).

^Variant is deemed damaging by at least four of seven bioinformatics tools (variant with CADD scaled C-score >15 is deemed to be deleterious).

**Table S7: Bioinformatic evaluation and frequencies of analyzed rare variants within *ACE***

|                         |                       |                       |                       |
|-------------------------|-----------------------|-----------------------|-----------------------|
| dbSNP rsID              | rs148943954**         | rs3730043**           | rs765069550           |
| hg19 position           | 17:61560846           | 17:61568577           | 17:61574683           |
| Reference Allele        | C                     | C                     | C                     |
| Alternate Allele        | G                     | T                     | T                     |
| cDNA change             | c.1513C>G             | c.2747C>T             | c.3877C>T             |
| ACC                     | p.Pro505Ala           | p.Thr916Met           | p.His1293Tyr          |
| MAF <sup>a</sup>        | 5.37x10 <sup>-4</sup> | 4.02x10 <sup>-3</sup> | 2.26x10 <sup>-5</sup> |
| MAF (NFE) <sup>b</sup>  | 1.24x10 <sup>-4</sup> | 6.50x10 <sup>-3</sup> | 4.38x10 <sup>-5</sup> |
| MAF (AMR) <sup>c</sup>  | 7.34x10 <sup>-4</sup> | 1.55x10 <sup>-3</sup> | 0                     |
| GERP score              | 4.90                  | 4.25                  | -0.28                 |
| PhyloP score            | 3.27                  | 2.39                  | 0.93                  |
| CADD score <sup>d</sup> | 25.4                  | 28.8                  | 15.1                  |
| FATHMM                  | damaging              | tolerated             | tolerated             |
| MutationTaster          | disease_causing       | disease_causing       | polymorphism          |
| Polyphen-2 HVAR         | possibly damaging     | probably damaging     | benign                |
| PROVEAN                 | deleterious           | deleterious           | neutral               |
| SIFT                    | damaging              | damaging              | damaging              |
| LRT                     | deleterious           | deleterious           | neutral               |

Abbreviations: ACC, amino acid change; MAF, minor allele frequency; NFE, Non-Finnish European; AMR, Latino; CADD, Combined Annotation Dependent Depletion; FATHMM, Functional Analysis through Hidden Markov Models; PROVEAN, Protein Variation Effect Analyzer; SIFT, Sorting Intolerant From Tolerant.

<sup>a</sup>MAFs are from gnomAD (Genome Aggregation Database) combining all populations; <sup>b</sup>MAFs are from gnomAD NFE population; <sup>c</sup>MAFs are from gnomAD AMR population; <sup>d</sup>Scaled CADD score.

\*Variant is deemed as conserved nucleotide (both GERP and PhyloP scores > 1).

^Variant is deemed damaging by at least four of seven bioinformatics tools (variant with CADD scaled C-score >15 is deemed to be deleterious).

**Table S8: Bioinformatic evaluation and frequencies of analyzed rare variants within *EPHA1***

|                         |                       |                       |
|-------------------------|-----------------------|-----------------------|
| dbSNP rsID              | rs139482378**         | rs139711610**         |
| hg19 position           | 7:143088584           | 7:143091417           |
| Reference Allele        | C                     | C                     |
| Alternate Allele        | T                     | T                     |
| cDNA change             | c.2897G>A             | c.2372G>A             |
| ACC                     | Arg966His             | p.Arg791His           |
| MAF <sup>a</sup>        | 6.01x10 <sup>-4</sup> | 3.26x10 <sup>-4</sup> |
| MAF (NFE) <sup>b</sup>  | 1.12x10 <sup>-3</sup> | 1.55x10 <sup>-5</sup> |
| MAF (AMR) <sup>c</sup>  | 3.67x10 <sup>-4</sup> | 3.11x10 <sup>-4</sup> |
| GERP score              | 5.24                  | 4.67                  |
| PhyloP score            | 2.51                  | 7.56                  |
| CADD score <sup>d</sup> | 35.0                  | 35.9                  |
| FATHMM                  | tolerated             | damaging              |
| MutationTaster          | disease causing       | disease causing       |
| Polyphen-2 HVAR         | probably damaging     | probably damaging     |
| PROVEAN                 | deleterious           | deleterious           |
| SIFT                    | damaging              | damaging              |
| LRT                     | deleterious           | deleterious           |

Abbreviations: ACC, amino acid change; MAF, minor allele frequency; NFE, Non-Finnish European; AMR, Latino; CADD, Combined Annotation Dependent Depletion; FATHMM, Functional Analysis through Hidden Markov Models; PROVEAN, Protein Variation Effect Analyzer; SIFT, Sorting Intolerant From Tolerant.

<sup>a</sup>MAFs are from gnomAD (Genome Aggregation Database) combining all populations; <sup>b</sup>MAFs are from gnomAD NFE population; <sup>c</sup>MAFs are from gnomAD AMR population; <sup>d</sup>Scaled CADD score.

\*Variant is deemed as conserved nucleotide (both GERP and PhyloP scores > 1).

^Variant is deemed damaging by at least four of seven bioinformatics tools (variant with CADD scaled C-score >15 is deemed to be deleterious).

**Table S9: Bioinformatic evaluation and frequencies of analyzed rare variants within *SORL1***

|                         |                            |                           |                           |                       |                       |                           |                           |
|-------------------------|----------------------------|---------------------------|---------------------------|-----------------------|-----------------------|---------------------------|---------------------------|
| dbSNP rsID              | rs1051430452 <sup>^^</sup> | rs150609294 <sup>^^</sup> | rs139710266 <sup>^^</sup> | rs62617129            | rs62622819            | rs140327834 <sup>^^</sup> | rs142884576 <sup>^^</sup> |
| hg19 position           | 11:121360768               | 11:121384931              | 11:121384991              | 11:121444958          | 11:121485599          | 11:121495816              | 11:121498300              |
| Reference Allele        | A                          | A                         | A                         | A                     | T                     | A                         | C                         |
| Alternate Allele        | G                          | C                         | G                         | G                     | A                     | T                         | T                         |
| cDNA change             | c.707A>G                   | c.1112A>C                 | c.1172A>G                 | c.3346A>G             | c.5439T>A             | c.6194A>T                 | c.6401C>T                 |
| ACC                     | p.Asp236Gly                | p.Asn371Thr               | p.Tyr391Cys               | p.Ile1116Val          | p.His1813Gln          | p.Asp2065Val              | p.Thr2134Met              |
| MAF <sup>a</sup>        | 3.98x10 <sup>-6</sup>      | 1.37x10 <sup>-3</sup>     | 3.18x10 <sup>-5</sup>     | 5.31x10 <sup>-3</sup> | 4.99x10 <sup>-3</sup> | 2.54x10 <sup>-3</sup>     | 3.29x10 <sup>-4</sup>     |
| MAF (NFE) <sup>b</sup>  | 8.79x10 <sup>-6</sup>      | 2.17x10 <sup>-3</sup>     | 4.40x10 <sup>-5</sup>     | 8.25x10 <sup>-3</sup> | 8.97x10 <sup>-3</sup> | 4.10x10 <sup>-3</sup>     | 5.89x10 <sup>-4</sup>     |
| MAF (AMR) <sup>c</sup>  | 0                          | 1.41x10 <sup>-4</sup>     | 0                         | 2.65x10 <sup>-3</sup> | 1.89x10 <sup>-3</sup> | 1.53x10 <sup>-3</sup>     | 5.64x10 <sup>-5</sup>     |
| GERP score              | 5.68                       | 5.66                      | 5.56                      | -5.57                 | -8.35                 | 5.32                      | 5.74                      |
| PhyloP score            | 8.73                       | 9.24                      | 9.24                      | -0.74                 | -1.34                 | 8.64                      | 2.63                      |
| CADD score <sup>d</sup> | 33.0                       | 24.1                      | 25.0                      | 0.05                  | 9.4                   | 25.5                      | 23.9                      |
| FATHMM                  | tolerated                  | tolerated                 | tolerated                 | damaging              | tolerated             | tolerated                 | damaging                  |
| MutationTaster          | disease causing            | disease causing           | disease causing           | polymorphism          | disease causing       | disease causing           | disease causing           |
| Polyphen-2 HVAR         | probably damaging          | possibly damaging         | probably damaging         | benign                | benign                | probably damaging         | benign                    |
| PROVEAN                 | deleterious                | deleterious               | deleterious               | neutral               | neutral               | deleterious               | neutral                   |
| SIFT                    | damaging                   | damaging                  | tolerated                 | tolerated             | tolerated             | tolerated                 | damaging                  |
| LRT                     | deleterious                | deleterious               | deleterious               | neutral               | neutral               | deleterious               | neutral                   |

Abbreviations: ACC, amino acid change; MAF, minor allele frequency; NFE, Non-Finnish European; AMR, Latino; CADD, Combined Annotation Dependent Depletion; FATHMM, Functional Analysis through Hidden Markov Models; PROVEAN, Protein Variation Effect Analyzer; SIFT, Sorting Intolerant From Tolerant.

<sup>a</sup>MAFs are from gnomAD (Genome Aggregation Database) combining all populations; <sup>b</sup>MAFs are from gnomAD NFE population; <sup>c</sup>MAFs are from gnomAD AMR population; <sup>d</sup>Scaled CADD score.

\*Variant is deemed as conserved nucleotide (both GERP and PhyloP scores > 1).

^Variant is deemed damaging by at least four of seven bioinformatics tools (variant with CADD scaled C-score >15 is deemed to be deleterious).

## **Supplemental Acknowledgements**

The Alzheimer's Disease Sequencing Project (ADSP) is comprised of two Alzheimer's Disease (AD) genetics consortia and three National Human Genome Research Institute (NHGRI) funded Large Scale Sequencing and Analysis Centers (LSAC). The two AD genetics consortia are the Alzheimer's Disease Genetics Consortium (ADGC) funded by NIA (U01 AG032984), and the Cohorts for Heart and Aging Research in Genomic Epidemiology (CHARGE) funded by NIA (R01 AG033193), the National Heart, Lung, and Blood Institute (NHLBI), other National Institute of Health (NIH) institutes and other foreign governmental and non-governmental organizations. The Discovery Phase analysis of sequence data is supported through UF1AG047133 (to Drs. Schellenberg, Farrer, Pericak Vance, Mayeux, and Haines); RF1AG015473 to Dr. Mayeux; U01AG049505 to Dr. Seshadri; U01AG049506 to Dr. Boerwinkle; U01AG049507 to Dr. Wijsman; and U01AG049508 to Dr. Goate.

The ADGC cohorts include: Adult Changes in Thought (ACT), the Alzheimer's Disease Centers (ADC), the Chicago Health and Aging Project (CHAP), the Memory and Aging Project (MAP), Mayo Clinic (MAYO), Mayo Parkinson's Disease controls, University of Miami, the Multi-Institutional Research in Alzheimer's Genetic Epidemiology Study (MIRAGE), the National Cell Repository for Alzheimer's Disease (NCRAD), the National Institute on Aging Late Onset Alzheimer's Disease Family Study (NIA-LOAD), the Religious Orders Study (ROS), the Texas Alzheimer's Research and Care Consortium (TARC), Vanderbilt University/Case Western Reserve University (VAN/CWRU), the Washington Heights-Inwood Columbia Aging Project (WHICAP) and the Washington University Sequencing Project (WUSP), the Columbia University Hispanic- Estudio Familiar de Influencia Genetica de Alzheimer (EFIGA), the University of Toronto (UT), and Genetic Differences (GD).

The CHARGE cohorts, with funding provided by 5RC2HL102419 and HL105756, include the following: Atherosclerosis Risk in Communities (ARIC) Study which is carried out as a collaborative study supported by NHLBI contracts (HHSN268201100005C, HHSN268201100006C, HHSN268201100007C,

HHSN268201100008C, HHSN268201100009C, HHSN268201100010C, HHSN268201100011C, and HHSN268201100012C), Austrian Stroke Prevention Study (ASPS), Cardiovascular Health Study (CHS), Erasmus Rucphen Family Study (ERF), Framingham Heart Study (FHS), and Rotterdam Study (RS). The three LSACs are: the Human Genome Sequencing Center at the Baylor College of Medicine (U54 HG003273), the Broad Institute Genome Center (U54HG003067), and the Washington University Genome Institute (U54HG003079).

Biological samples and associated phenotypic data used in primary data analyses were stored at Study Investigators institutions, and at the National Cell Repository for Alzheimer's Disease (NCRAD, U24AG021886) at Indiana University funded by NIA. Associated Phenotypic Data used in primary and secondary data analyses were provided by Study Investigators, the NIA funded Alzheimer's Disease Centers (ADCs), and the National Alzheimer's Coordinating Center (NACC, U01AG016976) and the National Institute on Aging Genetics of Alzheimer's Disease Data Storage Site (NIAGADS, U24AG041689) at the University of Pennsylvania, funded by NIA, and at the Database for Genotypes and Phenotypes (dbGaP) funded by NIH. Contributors to the Genetic Analysis Data included Study Investigators on projects that were individually funded by NIA, and other NIH institutes, and by private U.S. organizations, or foreign governmental or nongovernmental organizations.
